# Supplementary material for: A common pattern of DNase I footprinting throughout the human mtDNA unveils clues for a chromatin-like organization
Source: PubMed Central journal article supplement — Genome Res. 2018 Aug;28(8):1158–68. doi: 10.1101/gr.230409.117 (PMC6071632; doi:10.1101/gr.230409.117), 2018-08
Supplement: supp_gr.230409.117_Supplemental_Figure2.pdf [file supp_gr.230409.117_Supplemental_Figure2.pdf]

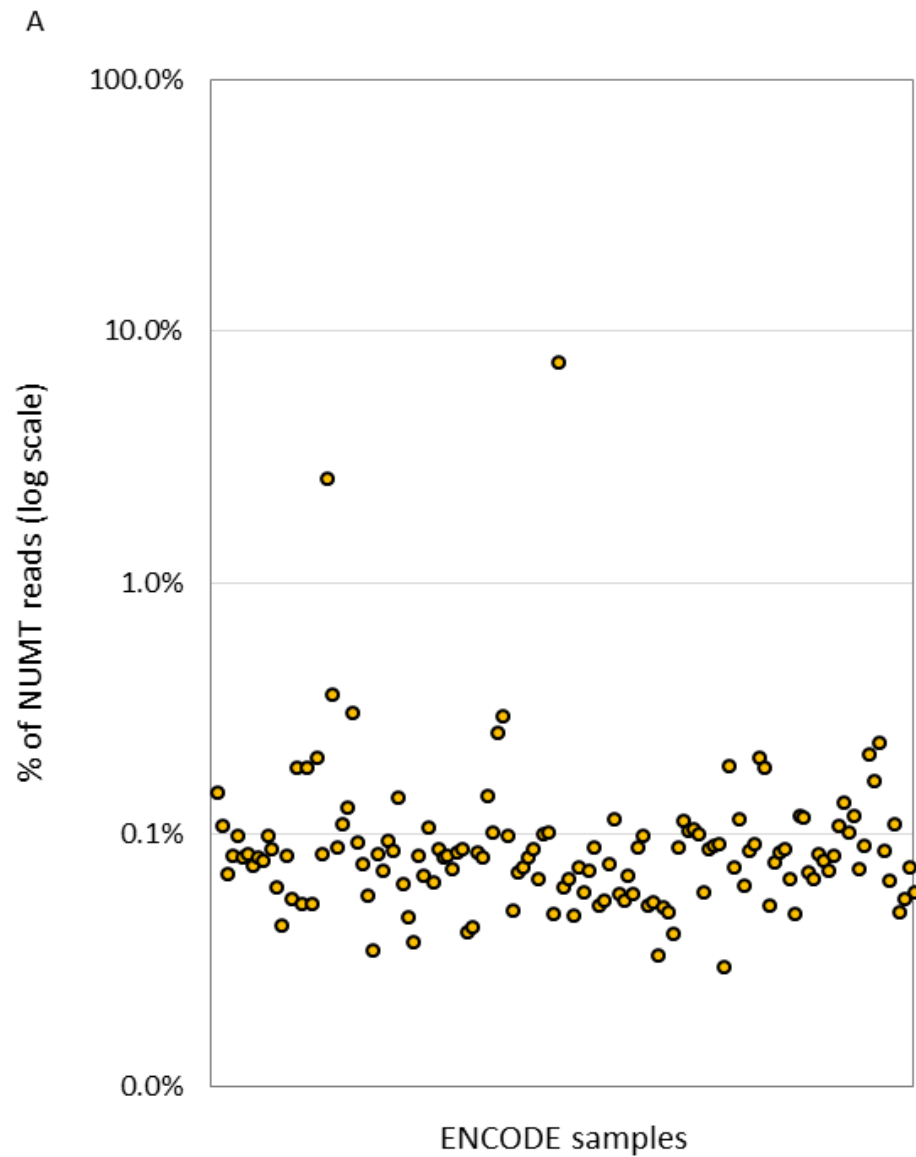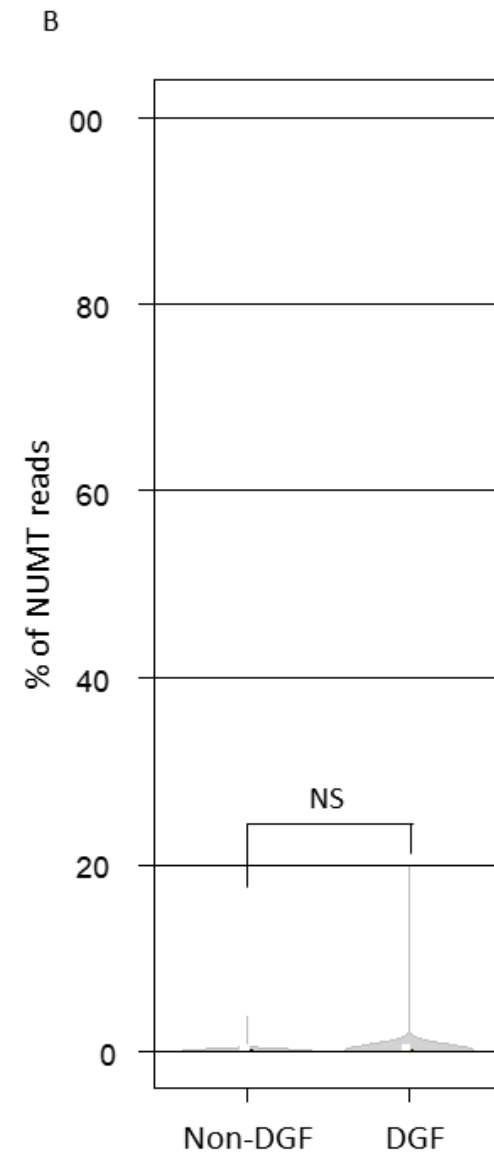

**Supplemental Figure S2. NUMT analysis.** NUMT analysis was applied to all of the analyzed ENCODE samples. A. proportion of NUMT reads from the entire reads of each samples. Y-axes: Percentage of NUMT reads from the total reads in each of the tested samples. X-axes: Each dot represents a single sample. B. A diagram comparing the prevalence of NUMT reads in mt-DGF and non-DGF sites.
