# Supplementary material for: A common pattern of DNase I footprinting throughout the human mtDNA unveils clues for a chromatin-like organization
Source: PubMed Central journal article supplement — Genome Res. 2018 Aug;28(8):1158–68. doi: 10.1101/gr.230409.117 (PMC6071632; doi:10.1101/gr.230409.117), 2018-08
Supplement: supp_gr.230409.117_Supplemental_Figure3.pdf [file supp_gr.230409.117_Supplemental_Figure3.pdf]

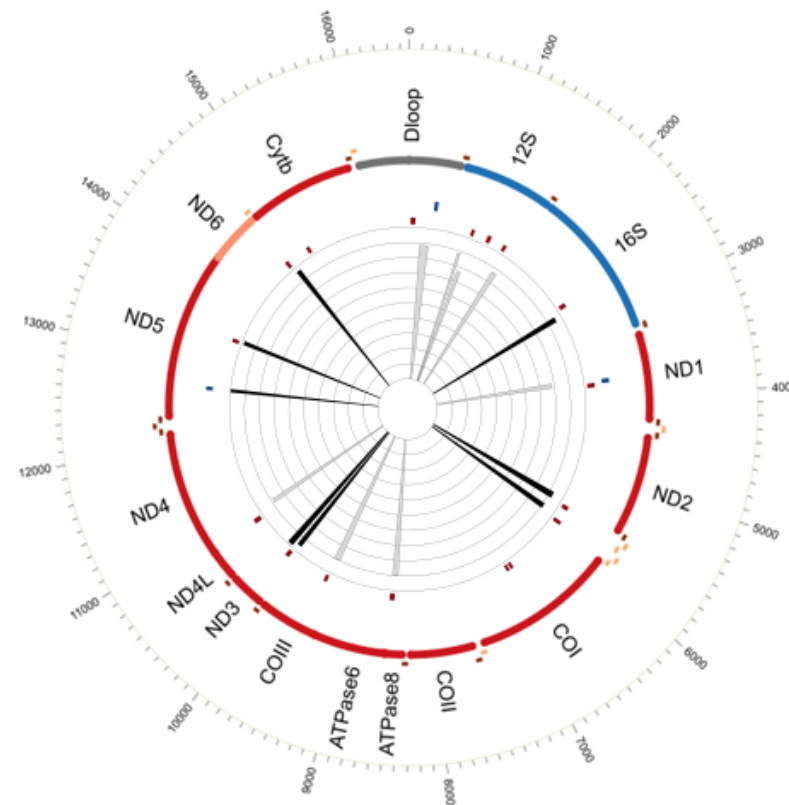

**Supplemental Figure S3. Regions of transcription pausing co-localize with mt-DGF sites.** The location of the 20 pausing sites across human mtDNA. Heavy strand (n=17) and light strand (n=3) pausing sites are marked by red and blue bars, respectively. The rays in the inner circle correspond to mt-DGF sites present in >75% of the ENCODE samples. The most common mt-DGF sites are colored in black.
