# Supplementary material for: A common pattern of DNase I footprinting throughout the human mtDNA unveils clues for a chromatin-like organization
Source: HighWire-hosted journal article supplement (doi:10.1101/gr.230409.117), 2018-07-12
Supplement: Supplemental_TableS1_summary_statistics_of_mapping_process.xlsx [file Supplemental_TableS1_summary_statistics_of_mapping_process.xlsx]

## Sheet: Human ENCODE
	Replicate 1				Replicate 2
Cell type	Average of reads coverage per position	SD of reads coverage in position	% of mtDNA position > 100 reads	% of mtDNA position > 1000 reads	average of reads density in position	SD of reads coverage per position	% of mtDNA position > 100 reads	% of mtDNA position > 1000 reads
A549	43484.5	14898.4	100	100	35726.2	12799.6	100	100
Ag04449	22236.4	7012.52	100	99.9457	23640.9	7407.59	100	100
Ag04450	14845.6	4961.33	100	99.994	25314.7	9126.95	100	99.9457
Ag09309	40829.5	11839.6	100	100	37026.4	10826.4	100	100
Ag09319	28679.4	8832.17	100	100	23856.3	8480.56	100	100
Ag10803	26258.5	8265.05	100	100	25392.3	7687.82	100	100
Aoaf	23451.5	7256.66	100	100	1611.11	447.024	100	91.3634
Be2c	5544.77	1846.38	100	99.7707	4943.2	1494.15	100	99.9819
Bj	56911.2	13676.9	100	100	19299.9	5037.37	100	100
Bjtert	56911.2	13676.9	100	100	19299.9	5037.37	100	100
Caco2	4547.76	1777.68	100	99.994	6266.13	3420.64	100	99.9638
Gm06990	7840.96	3861.02	100	99.6318	12505.8	5072	100	99.994
Gm12865	11485	4121.31	100	99.994	10080.6	4026.88	100	99.994
Gm12878	11572.3	3871.5	100	99.994	7571.67	2154.3	100	99.9095
H7es	20118.6	7097.57	100	100	8225.21	2672.92	100	99.994
Hac	17052.9	5907.28	100	100	15112.7	5172.69	100	100
Hae	4610.94	1523.44	100	99.994	25226	8492.35	100	100
Hah	19676.3	5156.47	100	100	10582.7	3197.4	100	99.994
Hasp	16321	5178.72	100	99.994	17143.9	4265.05	100	99.994
Hbmec	30651.9	7817.98	100	100	8713.13	2198.36	100	99.994
Hcfaa	10032.5	2960.52	100	99.8672	6538.91	1937.92	100	99.7948
Hcf	24610.2	7502.91	100	99.994	26033.8	8197.74	100	100
Hcm	25893.6	7867.79	100	100	12873.6	4315.07	100	100
Hconf	11574.3	4557.23	99.9879	99.7767	17731.1	6589.25	99.994	99.8552
Hcpe	5555.56	1773.26	100	99.8189	27513.8	9216.14	100	100
Hct116	41059.2	12121.4	100	100	34257.6	9798.23	100	100
Hee	29481	9244.47	100	100	24312.6	8287.44	100	100
Helas3	34175.6	9506.7	100	100	35175.3	11366.9	100	100
Hepg2	10444.8	5169.51	100	99.837	6063.53	2952.97	100	98.9197
Hffmyc	33614.1	9409.7	100	100	16996.1	5758.17	100	100
Hff	30137.6	10005.8	100	100	14322.9	4416.08	100	99.994
Hgf	2052.4	685.484	100	94.6285	6600.41	2184.25	100	99.662
Hipe	19366	6683.52	99.9759	99.9095	6608.7	1923.11	99.9638	99.7827
Hmec	40471.1	20827.6	100	100	58721.3	15969	100	100
Hmf	20742.6	6750.04	100	99.9819	16068.2	5352.58	99.994	99.9759
Hmvecdblad	11544.3	3480.09	100	99.994	10334.8	3302.42	100	99.994
Hmvecdblneo	17472.9	5437.86	100	100	19823.1	5962.17	100	100
Hmvecdlyad	49768.7	15730.6	100	100	37196.8	11623.8	100	100
Hmvecdlyneo	10249	3371.75	100	99.994	24160.3	7583.12	100	100
Hmvecdneo	37551	13829.6	100	100	9178.91	3279.62	100	99.994
Hmveclbl	7417.36	2073.04	100	99.8612	5933.47	1897.53	100	99.8612
Hmveclly	36206.3	12629.9	100	100	29914.6	10303.7	100	100
Hnpce	32185.7	10677.9	100	100	27115	8467.35	100	100
Hpaf	24408.2	7773.36	100	100	13465.1	4439.64	100	99.994
Hpdlf	9481.36	2636.68	100	99.8612	12273.1	3628.23	100	99.9336
Hpf	9461.69	2939.81	100	99.9215	17619.8	5051.72	100	99.9578
Hrce	6920.46	1903.57	100	99.8733	6184.15	1698.59	100	99.7767
Hre	9872.32	3150.89	100	99.9698	7828.97	2521.01	100	99.9336
Hrgec	4588.61	1430.35	100	99.7043	6473.57	1722.99	100	99.994
Hrpe	37735.2	12484.7	100	100	24155.5	7855.19	100	100
Hsmm	24823.9	7698.81	100	99.994	35448.5	9249.18	100	100
Huvec	9069.92	2261.5	100	99.994	9866.42	2777.85	100	99.994
Hvmf	7458.26	2009.9	100	99.994	5841.84	1924.04	100	99.994
Jurkat	16587.5	5061.83	100	99.9819	5600.61	2145.41	100	99.837
K562	25669.3	6829.57	100	100	31966	8595.45	100	100
Lncap	70214.3	20918.2	100	100	43184.5	13142.5	100	100
Mcf7	21310.2	6401.19	100	100	37944.4	12757.3	100	100
Nha	18053.9	5466.99	100	100	12180.8	3885.82	100	99.994
Nhdfad	2176.32	690.458	100	96.8435	1733.42	574.092	100	90.2468
Nhdfneo	17305.3	5350.58	100	100	27807.9	8506.71	100	100
Nhek	12505	4020.95	100	99.994	17939.2	5389.91	100	99.994
Nhlf	26045.5	8079.22	100	100	13827.4	4469.22	100	100
Panc1	12638.3	2979.84	100	99.8853	14016.9	3673.31	100	99.994
Rptec	39920.8	9909.86	100	100	29460.3	7349.67	100	100
Saec	6613.41	1769.55	100	99.994	4396.32	1122.47	100	99.994
Sknmc	6665.75	2259.39	100	99.9396	6317.03	1953.85	100	99.6982
Werirb1	7024.04	2254.73	100	99.9095	20904.9	5736.89	100	100
Wi38Ohtam	12350.8	3470.87	100	99.994	11182.7	3195.37	100	99.9336
Wi38	20952.8	6727.97	100	100	20216.3	6242.9	100	100
Supplemental Table S1: Summary statistics of the mtDNA mapping process.

## Sheet: Human RoadMap
Cell type	Average of reads coverage per position	SD of reads coverage per position	% of mtDNA position > 100 reads	% of mtDNA position > 1000 reads
adrenal_gland,_fetal_day101_M_	1545.06	453.66	100	88.0198
adrenal_gland,_fetal_day108_F_	1679.77	608.831	100	86.3359
adrenal_gland,_fetal_day108_M_	1696.97	596.235	99.994	88.2612
adrenal_gland,_fetal_day113_F_	4719.56	1168.15	100	99.8974
adrenal_gland,_fetal_day85_F_	2549.34	776.853	100	98.0687
adrenal_gland,_fetal_day85_M_	1896.3	689.532	100	89.8606
adrenal_gland,_fetal_day96_U_	1505.61	539.283	100	81.6887
brain,_fetal_day101_M_	149.22	42.3554	87.4947	0
brain,_fetal_day104_M_	188.7	60.2253	92.2204	0
brain,_fetal_day105_M_	151.929	46.0762	87.2956	0
brain,_fetal_day109_F_	165.507	52.8403	89.3838	0
brain,_fetal_day112_U_	267.041	61.2884	99.5413	0
brain,_fetal_day117_F_	208.031	70.8357	93.5422	0
brain,_fetal_day122_M_	173.033	56.3955	90.2046	0
brain,_fetal_day142_F_	1487.32	368.584	100	91.9488
brain,_fetal_day85_F_	218.155	72.5236	94.3268	0
brain,_fetal_day96_F_	295.653	96.101	98.4127	0
breast,_vHMEC_	19367.9	4164.64	100	100
CD14_primary_cells_	707.791	225.644	99.6741	9.56002
CD19_primary_cells_	2707.77	565.7	100	99.9698
CD20_primary_cells_	1002.77	260.697	99.9457	51.0713
CD34_mobilized_primary_cells_	7554.54	2107.49	100	99.9698
CD34_primary_cells_	3301.97	882.416	100	98.974
CD3_cord_blood_primary_cells_	2188.7	637.404	100	96.9159
CD3_mobilized_primary_cells_	2212.94	757.319	100	94.9906
CD3_primary_cells_	1866.24	620.831	100	91.9549
CD4_mobilized_primary_cells_	1700.69	399.794	100	96.0408
CD4_primary_cells_	4462.67	719.018	100	99.994
CD56_mobilized_primary_cells_	258.836	52.5132	99.5715	0
CD56_primary_cells_	2250.54	608.6	100	98.0445
CD8_mobilized_primary_cells_	3257.4	899.981	99.9759	99.3784
CD8_primary_cells_	430.538	120.133	99.994	0.187096
gastric_	764.006	197.254	99.7707	11.3767
H1_BMP4_derived_mesendoderm_cultured_cells_	5776.02	1290.56	100	99.825
H1_BMP4_derived_trophoblast_cultured_cells_	4415.23	1001.85	100	99.7767
H1_cell_line_	5327.26	1345.01	100	99.9155
H1_derived_mesenchymal_stem_cells_	8630.16	1936.11	100	99.9336
H1_derived_neuronal_progenitor_cultured_cells_	11721	2819.09	100	99.994
H9_cell_line_	3023.58	609.616	100	99.6077
heart,_fetal_day101_U_	21760.8	7488.48	100	100
heart,_fetal_day103_F_	1168.28	236.331	99.994	77.1441
heart,_fetal_day105_F_	3130.63	1242.56	100	96.2279
heart,_fetal_day105_M_	1366.73	312.05	100	88.0439
heart,_fetal_day110_F_	1974.56	419.37	100	97.9178
heart,_fetal_day110_M_	3078.83	549.904	100	99.4447
heart,_fetal_day117_F_	870.112	173.606	99.994	23.212
heart,_fetal_day120_M_	4341.01	1198.77	100	99.9517
heart,_fetal_day147_F_	1308.72	245.953	99.994	90.7297
heart,_fetal_day91_F_	3194.05	923.802	100	99.4387
heart,_fetal_day96_M_	274.187	68.7169	99.656	0
heart,_fetal_day96_U_	1270.6	411.191	99.994	73.7401
heart_	4127.66	1119.84	100	99.994
IMR90_cell_line_	10361.7	2920.77	100	99.9879
iPS_DF_19.11_cell_line_	9580.84	3402.79	100	99.9879
iPS_DF_19.7_cell_line_	8820.16	3084.15	100	99.994
iPS_DF_4.7_cell_line_	11588.7	3399.37	100	99.994
iPS_DF_6.9_cell_line_	9259.28	3270.69	100	99.994
kidney,_fetal_day105_F_	256.029	54.7736	99.4749	0
kidney,_fetal_day105_M_	331.653	89.5826	99.7888	0
kidney,_fetal_day108_F_	300.414	99.3288	98.8291	0
kidney,_fetal_day113_F_	260.159	72.8057	99.1671	0
kidney,_fetal_day121_F_	360.192	92.5039	99.7948	0
kidney,_fetal_day122_U_	503.028	221.493	98.7809	1.93132
kidney,_fetal_day82_F_	21785.2	6661.34	100	100
kidney,_fetal_day85_F_	220.317	43.2203	99.0343	0
kidney,_fetal_day85_M_	296.795	81.3441	99.4991	0
kidney,_fetal_day87_M_	111.913	29.5883	66.9865	0
kidney,_left,_fetal_day107_F_	81.772	23.4531	22.8499	0
kidney,_left,_fetal_day110_F_	221.791	45.2478	99.4085	0
kidney,_left,_fetal_day115_M_	612.307	219.526	99.837	3.8566
kidney,_left,_fetal_day147_F_	151.496	40.5276	91.9186	0
kidney,_left,_fetal_day87_F_	593.481	155.043	99.994	0.555254
kidney,_left,_fetal_day87_M_	627.034	175.242	99.994	2.19687
kidney,_left,_fetal_day96_M_	182.09	38.8174	98.0808	0
kidney,_left,_fetal_day98_F_	748.049	181.798	99.994	7.54421
kidney_renal_cortex,_fetal_day103_F_	639.517	168.757	99.994	2.19687
kidney_renal_cortex,_fetal_day108_M_	178.573	45.3325	95.1657	0
kidney_renal_cortex,_fetal_day113_M_	284.775	89.3766	97.7729	0
kidney_renal_cortex,_fetal_day120_F_	590.587	173.067	99.994	0.621643
kidney_renal_cortex,_fetal_day127_M_	286.92	65.8141	99.7948	0
kidney_renal_cortex,_fetal_day89_F_	1012.02	245.252	99.994	53.757
kidney_renal_cortex,_fetal_day91_M_	1023.57	270.679	99.994	54.5356
kidney_renal_cortex,_fetal_day96_F_	497.365	165.661	99.8189	0
kidney_renal_cortex,_fetal_day97_M_	401.992	139.978	99.5172	0
kidney_renal_cortex,_left,_fetal_day105_M_	485.246	105.441	99.994	0
kidney_renal_cortex,_left,_fetal_day120_M_	232.179	56.0421	99.2516	0
kidney_renal_cortex,_right,_fetal_day105_M_	498.622	93.871	99.994	0
kidney_renal_cortex,_right,_fetal_day120_M_	272.237	68.7773	99.5051	0
kidney_renal_pelvis,_fetal_day103_F_	1213.25	310.687	99.994	76.0758
kidney_renal_pelvis,_fetal_day105_F_	194.287	74.8836	89.9511	0
kidney_renal_pelvis,_fetal_day108_M_	297.464	96.8354	98.0445	0
kidney_renal_pelvis,_fetal_day113_M_	263.822	60.173	99.656	0
kidney_renal_pelvis,_fetal_day127_M_	361.866	91.7532	99.8491	0
kidney_renal_pelvis,_fetal_day89_F_	763.089	210.961	99.994	13.1571
kidney_renal_pelvis,_fetal_day91_M_	667.472	239.687	99.994	9.46949
kidney_renal_pelvis,_fetal_day96_F_	767.188	252.626	99.994	18.1846
kidney_renal_pelvis,_fetal_day97_M_	922.855	263.202	99.994	39.3687
kidney_renal_pelvis,_left,_fetal_day_105M_	1918.23	538.41	100	94.4656
kidney_renal_pelvis,_left,_fetal_day105_M_	315.667	72.6616	99.9819	0
kidney_renal_pelvis,_left,_fetal_day120_M_	375.627	98.3713	99.7827	0
kidney_renal_pelvis,_right,_fetal_day105_M_	327.336	95.3876	99.9215	0
kidney_renal_pelvis,_right,_fetal_day120_M_	342.017	102.35	99.6499	0
kidney,_right,_fetal_day107_F_	84.7471	24.3058	26.0668	0
kidney,_right,_fetal_day108_M_	158.81	38.682	94.5742	0
kidney,_right,_fetal_day115_M_	789.082	196.874	99.9879	14.1167
kidney,_right,_fetal_day117_F_	315.829	74.2187	99.4085	0
kidney,_right,_fetal_day147_F_	531.482	125.841	99.9879	0
kidney,_right,_fetal_day87_F_	513.635	131.648	99.8914	0
kidney,_right,_fetal_day87_M_	316.114	83.215	99.6801	0
kidney,_right,_fetal_day96_M_	292.279	64.7591	99.7465	0
kidney,_right,_fetal_day_98_F_	860.609	228.959	99.9638	27.7506
large_intestine,_fetal_day103_F_	626.771	158.882	99.994	1.26743
large_intestine,_fetal_day105_M_	461.815	148.442	99.825	0.0422476
large_intestine,_fetal_day107_F_	882.178	227.952	99.9034	30.3217
large_intestine,_fetal_day108_F_	1722.16	446.234	100	93.9345
large_intestine,_fetal_day108_M_	538.04	107.317	99.8491	0
large_intestine,_fetal_day110_F_	1595.62	363.492	100	93.9345
large_intestine,_fetal_day113_M_	1536.09	355.691	100	92.3472
large_intestine,_fetal_day115_M_	835.27	236.938	99.994	27.141
large_intestine,_fetal_day120_F_	1209.26	358.322	99.994	71.4829
large_intestine,_fetal_day85_F_	1176.42	359.403	99.994	67.8436
large_intestine,_fetal_day91_F_	1384.03	269.185	99.994	91.9005
large_intestine,_fetal_day91_M_	315.193	90.257	99.3603	0
large_intestine,_fetal_day98_F_	3542.51	1321.6	100	97.6221
lung,_fetal_day101_U_	856.782	289.011	99.9095	30.5329
lung,_fetal_day103_M_	794.479	192.122	99.994	13.7848
lung,_fetal_day108_F_	273.952	97.1634	96.5478	0
lung,_fetal_day108_M_	181.513	59.4701	92.1601	0
lung,_fetal_day112_U_	402.43	95.3686	99.9879	0
lung,_fetal_day113_M_	481.623	113.281	99.9698	0
lung,_fetal_day122_U_	1014.37	425.316	99.994	49.4659
lung,_fetal_day67_M_	202.312	63.1382	94.4535	0
lung,_fetal_day82_M_	1137.39	247.679	99.9879	72.6477
lung,_fetal_day85_F_	130.073	42.0387	77.4096	0
lung,_fetal_day91_M_	465.401	149.985	99.4266	0.0482829
lung,_fetal_day96_F_	170.509	63.0254	86.9033	0
lung,_fetal_day98_F_	326.694	83.0138	99.994	0
lung,_left,_fetal_day105_F_	294.503	59.9434	99.5172	0
lung,_left,_fetal_day105_M_	631.972	141.069	99.9457	0.657855
lung,_left,_fetal_day107_F_	694.885	168.817	99.994	2.60728
lung,_left,_fetal_day110_F_	430.54	100.525	99.837	0
lung,_left,_fetal_day115_M_	1831	707.702	100	87.7723
lung,_left,_fetal_day117_F_	351.039	108.419	99.8552	0
lung,_left,_fetal_day87_M_	451.811	106.316	99.994	0
lung,_left,_fetal_day91_F_	301.178	78.0819	99.6077	0
lung,_left,_fetal_day96_M_	640.769	142.437	99.994	0.410405
lung,_right,_fetal_day105_F_	537.143	139.813	99.9819	0
lung,_right,_fetal_day105_M_	397.281	91.2336	99.8552	0
lung,_right,_fetal_day107_F_	376.941	98.6595	99.7827	0
lung,_right,_fetal_day108_F_	639.539	194.196	99.8612	2.79438
lung,_right,_fetal_day110_F_	263.911	54.8164	99.6982	0
lung,_right,_fetal_day115_M_	467.033	104.145	99.8672	0
lung,_right,_fetal_day117_F_	316.007	93.4073	99.7465	0
lung,_right,_fetal_day87_M_	372.386	91.0547	99.8431	0
lung,_right,_fetal_day91_F_	422.523	118.038	99.9276	0
lung,_right,_fetal_day96_M_	325.958	88.7055	99.6439	0
lung,_right,_fetal_day98_F_	817.831	224.187	99.994	22.1739
muscle,_arm,_fetal_day101_M_	184.231	51.4906	95.3347	0
muscle,_arm,_fetal_day101_U_	564.386	151.491	99.8552	0.114672
muscle,_arm,_fetal_day104_M_	403.728	120.75	99.994	0.175026
muscle,_arm,_fetal_day105_F_	962.004	299.84	99.994	44.9575
muscle,_arm,_fetal_day105_M_	252.222	51.796	99.3784	0
muscle,_arm,_fetal_day113_M_	192.214	47.3583	98.0868	0
muscle,_arm,_fetal_day115_F_	220.847	61.1968	98.4308	0
muscle,_arm,_fetal_day115_M_	422.483	91.7065	99.994	0
muscle,_arm,_fetal_day120_F_	569.509	179.159	99.8491	0.790633
muscle,_arm,_fetal_day120_M_	870.081	229.477	99.994	30.6898
muscle,_arm,_fetal_day127_M_	135.777	30.8396	87.8146	0
muscle,_arm,_fetal_day85_F_	405.425	119.412	99.9457	0
muscle,_arm,_fetal_day91_M_	1341.05	480.584	99.994	75.4904
muscle,_arm,_fetal_day96_M_	312.439	72.7843	99.8974	0
muscle,_arm,_fetal_day97_M_	520.071	125.029	99.994	0
muscle,_arm,_fetal_day98_F_	842.262	265.623	99.994	29.1327
muscle,_back,_fetal_day101_M_	277.694	82.5647	99.1249	0
muscle,_back,_fetal_day104_M_	16378.8	4279.44	100	100
muscle,_back,_fetal_day105_F_	1235.17	411.803	100	71.4286
muscle,_back,_fetal_day105_M_	412.471	83.321	99.8672	0
muscle,_back,_fetal_day108_M_	277.331	70.6071	99.5534	0
muscle,_back,_fetal_day113_F_	324.312	100.681	99.7224	0
muscle,_back,_fetal_day115_F_	439.769	101.731	99.994	0
muscle,_back,_fetal_day127_M_	308.992	67.1933	99.7646	0
muscle,_back,_fetal_day85_F_	330.078	105.185	99.2516	0
muscle,_back,_fetal_day91_M_	768.373	201.759	99.994	12.4027
muscle,_back,_fetal_day96_M_	289.448	70.1828	99.9698	0
muscle,_back,_fetal_day98_F_	716.872	249.392	99.994	13.3623
muscle,_leg,_fetal_day101_M_	432.022	144.236	99.9457	0.0603537
muscle,_leg,_fetal_day104_M_	633.855	169.057	99.994	1.6899
muscle,_leg,_fetal_day105_M_	361.963	74.1856	99.7767	0
muscle,_leg,_fetal_day113_F_	656.964	210.399	99.994	5.0335
muscle,_leg,_fetal_day113_M_	373.145	93.0726	99.8491	0
muscle,_leg,_fetal_day115_F_	258.148	52.7926	99.8853	0
muscle,_leg,_fetal_day115_M_	353.808	71.1653	99.8672	0
muscle,_leg,_fetal_day127_M_	408.35	139.764	99.831	0
muscle,_leg,_fetal_day85_F_	345.425	104.466	99.7586	0
muscle,_leg,_fetal_day96_M_	379.538	79.3712	99.994	0
muscle,_leg,_fetal_day97_M_	934.043	219.549	99.994	39.1997
muscle,_lower_limb,_fetal_day120_M_	1137.65	388.866	100	62.2608
muscle,_trunk,_fetal_day113_F_	483.731	136.011	99.9759	0.132778
muscle,_trunk,_fetal_day120_F_	754.244	266.561	99.994	18.6493
muscle,_trunk,_fetal_day121_F_	646.525	193.52	99.8974	3.71779
muscle,_upper_back,_fetal_day96_M_	298.427	71.667	99.825	0
muscle,_upper_limb,_fetal_day108_F_	388.792	110.996	99.7646	0
muscle,_upper_trunk,_fetal_day108_F_	327.46	83.0374	99.6801	0
ovary,_fetal_	387.671	111.168	99.6017	0
ovary_	593.323	161.794	99.994	0.850987
pancreas_	7009.94	1588.48	100	99.994
penis_foreskin_fibroblast_primary_cells_	9281.67	3386.99	100	99.7767
penis_foreskin_keratinocyte_primary_cells_	9024.97	1867.08	100	99.994
penis_foreskin_melanocyte_primary_cells_	11417.7	3020.66	100	99.994
placenta,_day105_	1249.57	329.622	100	78.2425
placenta,_day108_	1804.65	511.36	100	93.4637
placenta,_day113_	532.754	160.671	99.837	0.241415
placenta,_day85_	584.395	155.479	99.994	0.356087
placenta,_day91_	426.816	125.417	99.9336	0
psoas_muscle_	558.027	147.865	99.7103	0.066389
skin,_abdomen,_fetal_day97_M_	14068.1	3651.28	100	100
skin,_back,_fetal_day96_M_	17630.5	4378.9	100	100
skin,_biceps_left,_fetal_day97_M_	19796.3	4762.38	100	100
skin,_biceps_right,_fetal_day97_M_	10169.3	2685.12	100	100
skin,_fetal_day82_F_	3028.79	932.299	100	99.5051
skin,_quadricips_left,_fetal_day97_M_	22222.7	5439.32	100	100
skin,_quadricips_right,_fetal_day97_M_	14489.2	3571.42	100	100
skin,_scalp,_fetal_day97_M_	15508.1	4234.15	100	100
skin,_upper_back,_fetal_day97_M_	14277.4	3627.9	100	100
small_intestine,_fetal_day105_F_	2366.17	559.798	100	98.4549
small_intestine,_fetal,_day105_M_	1540.46	317.8	99.9879	95.2502
small_intestine,_fetal,_day107_F_	687.288	176.027	99.994	3.00561
small_intestine,_fetal,_day108_F_	1089.53	262.617	99.9879	64.1922
small_intestine,_fetal_day108_M_	633.962	139.876	99.8914	0.440582
small_intestine,_fetal_day110_F_	1230.6	307.699	99.994	78.5382
small_intestine,_fetal_day115_M_	865.408	317.886	99.9457	34.7034
small_intestine,_fetal,_day120_F_	1286.75	445.782	100	71.851
small_intestine,_fetal,_day87_M_	815.602	271.139	99.9879	26.0486
small_intestine,_fetal,_day91_F_	772.581	175.593	99.994	7.9003
small_intestine,_fetal_day91_M_	529.7	129.566	99.8612	0
small_intestine,_fetal,_day98_F_	1369.92	489.226	100	75.774
small_intestine_	8209.79	2123.09	100	99.994
spinal_cord,_fetal_day105_M_	527.644	121.884	99.9034	0.0120707
spinal_cord,_fetal_day113_F_	777.818	229.236	99.994	16.5671
spinal_cord,_fetal_day87_F_	547.523	155.42	99.9759	0.331945
spinal_cord,_fetal_day89_F_	1257.56	348.742	99.994	76.7035
spinal_cord,_fetal_day96_M_	424.888	122.973	99.9276	0.0120707
spleen,_fetal_day112_U_	1292.01	355.99	99.994	80.1014
stomach,_fetal,_day101_U_	1181.27	276.613	99.9879	77.3191
stomach,_fetal,_day105_F_	451.671	123.262	99.994	0.0482829
stomach,_fetal_day105_M_	1695.75	446.929	100	93.9948
stomach,_fetal,_day107_F_	1910.95	484.119	100	96.0348
stomach,_fetal_day108_F_	1382.42	382.121	99.9759	84.2598
stomach,_fetal_day108_M_	814.765	305.641	99.9879	27.129
stomach,_fetal_day121_F_	1309.77	369.974	99.994	79.3651
stomach,_fetal,_day127_M_	856.492	270.284	99.994	30.5269
stomach,_fetal,_day147_F_	1269.64	390.899	99.994	77.1441
stomach,_fetal_day91_M_	1301.53	297.454	99.9819	84.8633
stomach,_fetal_day96_F_	1505.92	492.717	100	85.3884
stomach,_fetal_day98_F_	1790.3	603.154	100	89.8606
testes,_fetal_	1054.32	265.345	99.9879	60.5106
thymus,_fetal_day104_M_	894.18	258.941	99.994	31.7883
thymus,_fetal_day105_F_	690.064	215.325	99.994	7.44161
thymus,_fetal_day108_M_	534.493	128.865	99.9517	0.205202
thymus,_fetal_day113_F_	952.087	264.892	99.994	44.2815
thymus,_fetal_day113_M_	267.048	78.0718	99.2033	0
thymus,_fetal_day127_M_	1417.81	447.393	100	81.9482
thymus,_fetal_day147_F_	766.451	153.885	99.994	5.31716
thymus,_fetal_day97_M_	347.493	87.9278	99.994	0

## Sheet: Human ATAC-seq
Cell type	Average of reads coverage per position	SD of reads density per position	% of mtDNA position > 100 reads	% of mtDNA position > 1000 reads
Neural stem cell (ERR1013032)	160740	35839	100	100
Neural stem cell (ERR1013034)	76273.4	18597.9	100	100
Neural stem cell (ERR1013035)	94933.7	22316.8	100	100
GM12878_1	623567	161105	100	100
GM12878_2	204238	51428.7	100	100
GM12878_3	367183	99250.2	100	100
GM12878_4	267765	70906.7	100	100
CD34 (SRR2453157)	124689	31904.1	100	100
CD34 (SRR2453158)	97339.2	23979.5	100	100
CD34 (SRR2453163)	90225.9	23120.7	100	100

## Sheet: Mouse ENCODE
	Replicate 1				Replicate 2
Cell type	Average of reads coverage per position	SD of reads coverage per position	% of mtDNA position > 100 reads	% of mtDNA position > 1000 reads	Average of reads coverage per position	SD of reads coverage in position	% of mtDNA position > 100 reads	% of mtDNA position > 1000 reads
416bC57bl6MAdult8wks	9731.09	2732.1	98.3705	98.3705	3894.46	1097.71	98.3705	98.2075
A20BalbcannMAdult8wks	3120.37	1093.89	98.3705	98.2316	742.372	202.832	98.3705	10.4895
Bcellcd19pC57bl6MAdult8wks	485.977	182.974	98.3705	0.700103	854.616	309.84	98.3705	29.4767
Bcellcd43nC57bl6MAdult8wks	1086.72	465.125	98.3644	51.2403	1729.6	604.319	98.3705	87.199
CerebrumC57bl6MAdult8wks	153.681	61.5524	78.7374	0	55.912	23.8731	4.90675	0
Ch122a4bFImmortal	936.274	466.843	98.3705	37.7935	348.079	128.787	98.1592	0.120707
Escj7S129ME0	1166.43	512.237	98.3705	58.1387	807.27	407.833	98.2497	30.3338
Ese14129olaME0	4738.71	2599.02	98.3705	98.1894	7623.74	1783.45	98.3705	98.3705
Esww6koUknME0	6137.07	2212.28	98.3705	98.3705	2164.83	1151.63	98.3705	84.0787
Esww6UknME0	3513.23	1057.77	98.3705	98.3705	1573.19	758.174	98.3705	72.7684
FatC57bl6MAdult8wks	224.639	110.679	88.5026	0	416.656	141.844	98.3584	0.0120707
FibroblastC57bl6MAdult8wks	24870	9423.68	98.3705	98.3705	24906	6774.3	98.3705	98.3705
FlbudCd1ME11half	296.927	185.135	87.6818	0.289698	1067.13	499.473	98.3705	48.12
GfatC57bl6MAdult8wks	3292.15	836.769	98.3705	98.3584	4980.79	1599.54	98.3705	98.3041
HeartC57bl6MAdult8wks	3259.62	1200.46	98.3705	98.1894	6706.62	3770.7	98.3705	98.2316
HlbudCd1ME11half	499.119	251.512	98.0204	3.49448	376.963	115.634	98.3644	0
HlembryoCd1ME11half	127.862	60.1052	61.0779	0	27.9647	16.8239	0.15692	0
KidneyC57bl6MAdult8wks	418.956	173.529	98.1411	0.784598	139.591	83.3158	59.4423	0
LgintC57bl6MAdult8wks	1393.3	531.896	98.3705	74.8868	707.645	233.919	98.3705	10.5498
Liver129dlcrME14half	747.341	371.704	98.286	23.0732	1300.95	535.792	98.3222	65.6829
LiverC57bl6MAdult8wks	237.729	82.41	96.7288	0	51.4649	26.4436	4.78001	0
LungC57bl6MAdult8wks	232.796	99.4705	91.7919	0	208.47	90.4691	90.0598	0
MelC57bl6MAdult8wks	550.428	264.381	98.298	6.15607	363.655	156.73	97.8695	0.0241415
MesodermCd1ME11half	1169.49	607.17	98.3705	52.3447	579.341	324.295	97.785	11.3163
MgerUknImmortalDiffc24h	28027.1	7625.04	98.3705	98.3705	19861.3	4873.07	98.3705	98.3705
MgerUknImmortalDiffc48h	19925.3	10494.5	98.3705	98.3101	22402.6	5939.3	98.3705	98.3705
MgerUknImmortal	27144.1	7490.39	98.3705	98.2558	48525.5	13342.4	98.3705	98.3705
Nih3t3NihsMImmortal	6889.26	4388.34	98.3705	97.8876	11883.8	5575.71	98.3705	98.2497
PatskiSpbl6MImmortal	12367.4	2821.05	98.3705	98.3705	9135.87	2583.4	98.3705	98.3705
SkmuscleC57bl6MAdult8wks	19341.7	8773.42	98.3705	98.3705	4487.74	1433.77	98.3705	98.3705
SpleenC57bl6MAdult8wks	464.181	153.966	98.3705	0.00603537	393.848	153.036	98.3644	0
ThelpaC57bl6MAdult8wks	846.226	331.192	98.3644	30.6898	209.345	64.6523	96.5236	0
ThymusC57bl6MAdult8wks	425.496	123.685	98.3705	0	371.424	133.741	98.2075	0
TnaiveC57bl6MAdult8wks	385.934	117.804	98.2015	0	1174.11	570.133	98.3705	53.7389
TregaC57bl6MAdult8wks	164.688	58.964	87.3076	0	175.29	43.11	96.1555	0
TregC57bl6MAdult8wks	534.326	291.063	97.9963	6.98896	1660.81	634.146	98.3705	84.5676
WbrainC57bl6MAdult8wks	36.4967	24.926	2.13652	0	1524.13	386.269	98.3705	90.79
WbrainC57bl6ME14half	27.2101	14.1245	0.0603537	0	28.4714	14.3832	0.0482829	0
WbrainC57bl6ME18half	130.782	45.0803	71.7243	0	16.3864	8.87615	0	0
WholebrainC57bl6MAdult8wks	36.4967	24.926	2.13652	0	1524.13	386.269	98.3705	90.79
WholebrainC57bl6ME14half	27.2101	14.1245	0.0603537	0	28.4714	14.3832	0.0482829	0
Zhbtc4129olaME0Diffb24h	7029.03	3258.44	98.3705	98.3705	2489.21	1181.53	98.3705	90.3796
Zhbtc4129olaME0Diffb6h	9070.25	2467.65	98.3705	98.3705	528.444	187.311	98.2558	1.31571

## Sheet: Human CD34+
Cell type	Average of reads coverage per position	SD of reads density per position	% of mtDNA position > 100 reads	% of mtDNA position > 1000 reads
chrM_human_CD34_normal_1	3946.9	1281.28	100	99.6077
chrM_human_CD34_normal_2	871.067	259.527	99.994	30.1648
chrM_human_CD34_treat_1_1_1	2293.62	769.03	100	96.6443
chrM_human_CD34_treat_1_1_2	2248.81	745.414	100	96.246
chrM_human_CD34_treat_2_1_1	1953.15	388.886	100	99.7163
chrM_human_CD34_treat_2_1_2	9090.7	1799.73	100	99.994
chrM_human_CD34_treat_2_2_1	2656.46	923.007	100	96.1253
chrM_human_CD34_treat_2_2_2	3494.86	1168.3	100	99.1732
chrM_human_CD34_treat_3_1_1	803.546	201.423	99.9578	15.7946
chrM_human_CD34_treat_3_1_2	1804.65	469.351	100	95.8658
chrM_human_CD34_treat_3_2_1	595.383	128.546	99.994	0.187096
chrM_human_CD34_treat_3_2_2	3024.37	643.55	100	99.8672
chrM_human_CD34_treat_4_1_1	6357.98	1236.48	100	99.9819
chrM_human_CD34_treat_4_1_2	1267.48	253.622	99.994	85.6117
chrM_human_CD34_treat_4_2_1	14425.1	2874.55	100	100
chrM_human_CD34_treat_4_2_2	63573.3	12280.5	100	100
chrM_human_CD34_treat_5_1_1	700.554	166.178	99.8853	3.55483
chrM_human_CD34_treat_5_1_2	1076.15	231.122	99.994	61.7358
chrM_human_CD34_treat_5_2_1	2907.34	676.908	100	99.7646
chrM_human_CD34_treat_5_2_2	712.315	162.12	99.994	4.81019
chrM_human_CD34_treat_6_1_1	5324.34	2121.42	100	99.9879
chrM_human_CD34_treat_6_1_2	672.216	257.782	99.994	11.3887
chrM_human_CD34_treat_6_2_1	1819.42	448.4	100	96.8254
chrM_human_CD34_treat_6_2_2	9508.23	2445.49	100	99.994
chrM_human_CD34_treat_7_1_1	2465.89	652.376	100	98.4006
chrM_human_CD34_treat_7_1_2	4509.77	1218.58	100	99.9578
chrM_human_CD34_treat_7_2_1	9555.77	1734.36	100	99.994
chrM_human_CD34_treat_7_2_2	9301.96	1688.26	100	99.994
chrM_human_CD34_treat_8_1_1	5164.88	1406.67	100	99.994
chrM_human_CD34_treat_8_1_2	1083.78	284.463	100	56.9075
chrM_human_CD34_treat_9_1_1	611.513	199.859	99.994	2.92112
chrM_human_CD34_treat_9_2_1	3105.32	868.426	100	99.7707

## Sheet: TFAM ChIP-seq in HeLa
Cell type	Average of reads coverage per position	SD of reads coverage in position	% of mtDNA position > 100 reads	% of mtDNA position > 1000 reads
TFAM ChIP-seq in HELA rep 1	69028.9	30918.1	100	100
TFAM ChIP-seq in HELA rep 2	629.461	148.99	99.8914	0.392299
TFAM ChIP-seq in HELA rep 3	42869.4	15259.2	100	100
TFAM ChIP-seq in HELA rep 4	42478.7	16571.3	100	100
