# Supplementary material for: A common pattern of DNase I footprinting throughout the human mtDNA unveils clues for a chromatin-like organization
Source: HighWire-hosted journal article supplement (doi:10.1101/gr.230409.117), 2018-07-12
Supplement: Supplemental_TableS2_data_from_ENCODE_RoadMap.xlsx [file Supplemental_TableS2_data_from_ENCODE_RoadMap.xlsx]

## Sheet: ENCODE
mtDNA position- start	mtDNA position- end	% of tested samples	mtDNA regulatory elemnts
180	186	0.0144928
195	335	0.884058	CSB1-2/ORI-H
378	392	0.0144928		Supplemental Table S2: Human mt-DGF sites from ENCODE and RoadMap data.
400	438	0.101449	LSP
458	467	0.0289855
484	598	0.913043	HSP1
628	687	0.913043	HSP2
722	728	0.0144928
781	783	0.0144928
793	796	0.0144928
803	807	0.0144928
832	877	0.884058
922	987	0.768116
1009	1010	0.0144928
1019	1035	0.0289855
1133	1189	0.405797
1229	1253	0.231884
1307	1369	0.652174
1408	1458	0.695652
1475	1556	0.869565
1581	1607	0.0144928
1624	1654	0.73913
1694	1697	0.0289855
1718	1724	0.0144928
1744	1748	0.101449
1756	1758	0.0144928
1764	1772	0.0434783
1785	1857	0.956522
1886	1919	0.057971
1945	2028	0.782609
2059	2064	0.130435
2088	2155	0.463768
2190	2271	0.173913
2295	2376	0.391304
2391	2394	0.0144928
2404	2416	0.478261
2445	2496	0.898551
2530	2537	0.0289855
2550	2565	0.0434783
2579	2589	0.057971
2600	2619	0.73913
2660	2674	0.144928
2690	2769	0.956522
2805	2885	0.710145
2999	3001	0.0144928
3023	3026	0.0144928
3089	3202	0.376812
3254	3315	0.73913	Transcription terminator
3338	3359	0.101449
3416	3450	0.101449
3489	3537	0.536232
3578	3583	0.0144928
3589	3591	0.057971
3603	3621	0.115942
3694	3768	0.782609
3774	3804	0.0144928
3817	3830	0.289855
3880	3935	0.15942
3946	3957	0.0144928
3980	4032	0.898551
4088	4119	0.869565
4165	4207	0.985507
4259	4323	0.971014
4341	4342	0.0144928
4356	4380	0.0434783
4408	4412	0.0144928
4427	4476	0.231884
4555	4608	0.681159
4633	4686	0.246377
4731	4791	0.855072
4835	4841	0.0144928
4848	4851	0.0144928
4885	4928	0.913043
4989	5007	0.0434783
5049	5106	0.985507
5180	5285	0.797101
5309	5339	0.0724638
5375	5467	0.724638
5480	5577	0.927536
5633	5665	0.666667
5674	5690	0.0434783
5707	5790	0.913043	ORI-L
5832	5921	0.347826
5938	5982	0.681159
6001	6037	0.768116
6099	6135	0.826087
6147	6159	0.057971
6182	6257	0.956522
6263	6278	0.0434783
6285	6289	0.0144928
6311	6329	0.0289855
6355	6454	0.956522
6480	6502	0.15942
6554	6557	0.0869565
6568	6624	0.188406
6630	6654	0.0869565
6681	6685	0.0144928
6694	6699	0.0289855
6717	6737	0.173913
6782	6800	0.15942
6829	6846	0.0289855
6904	6915	0.130435
6953	6966	0.0144928
7029	7067	0.666667
7138	7141	0.0144928
7148	7179	0.507246
7193	7211	0.0144928
7270	7364	0.942029
7365	7457	0.956522
7480	7485	0.0144928
7498	7570	0.826087
7610	7665	0.26087
7720	7731	0.0289855
7738	7799	0.289855
7827	7836	0.101449
7888	7937	0.550725
7952	7956	0.0144928
7990	8005	0.0144928
8013	8015	0.0144928
8031	8076	0.913043
8109	8112	0.130435
8125	8146	0.144928
8168	8172	0.0144928
8201	8347	0.942029
8371	8389	0.0289855
8440	8529	0.898551
8546	8607	0.115942
8657	8667	0.0144928
8695	8767	0.884058
8775	8793	0.0434783
8836	8852	0.0144928
8858	8872	0.057971
8883	8901	0.362319
8923	8976	0.521739
9003	9004	0.0144928
9012	9015	0.0144928
9028	9037	0.0289855
9063	9119	0.985507
9248	9293	0.202899
9360	9392	0.0289855
9414	9509	0.898551
9528	9568	0.0724638
9579	9631	0.507246
9663	9734	1
9741	9764	0.289855
9812	9814	0.0144928
9823	9861	0.173913
9905	9923	0.0869565
9929	9947	0.0434783
9964	9968	0.0144928
9980	9981	0.0144928
10024	10027	0.0144928
10038	10039	0.0144928
10048	10121	0.956522
10166	10252	0.985507
10294	10341	0.985507	Jun-D;c-Jun
10416	10418	0.0144928
10424	10508	0.942029
10540	10541	0.0144928
10609	10694	0.115942
10760	10799	0.0869565
10845	10905	0.884058
10911	10942	0.0724638
10948	10968	0.869565
11046	11121	0.971014
11182	11217	0.405797
11345	11393	0.927536	CEBPb
11410	11414	0.0144928
11432	11465	0.637681
11508	11538	0.405797
11550	11571	0.15942
11581	11603	0.26087
11647	11726	0.724638
11763	11765	0.0144928
11782	11784	0.0144928
11800	11847	0.73913
11917	11966	0.362319
11983	11987	0.246377
11996	11998	0.0144928
12059	12105	0.797101
12144	12196	0.73913
12236	12296	0.608696
12337	12387	0.855072
12415	12424	0.057971
12431	12449	0.188406
12455	12465	0.0144928
12481	12503	0.0289855
12509	12529	0.0289855
12573	12607	0.898551
12672	12718	1
12781	12795	0.521739
12843	12882	0.710145
12923	12931	0.0144928
12939	12956	0.478261
13012	13038	0.507246
13066	13115	0.942029
13123	13136	0.202899
13155	13199	0.797101
13207	13216	0.188406
13229	13274	0.884058
13319	13321	0.0144928
13337	13346	0.202899
13392	13450	0.985507
13492	13494	0.0144928
13545	13583	0.608696
13638	13661	0.0289855
13669	13694	0.0289855
13701	13734	0.144928
13740	13750	0.0434783
13756	13758	0.0144928
13780	13793	0.753623
13810	13830	0.0144928
13855	13938	0.782609
13944	13966	0.681159
14009	14028	0.623188
14048	14114	0.811594
14181	14213	0.347826
14267	14331	0.826087
14434	14435	0.0144928
14479	14548	0.985507
14556	14566	0.0144928
14586	14618	0.652174	Mef2D
14643	14683	0.333333
14743	14815	0.971014
14899	14904	0.0144928
14987	15001	0.144928
15134	15136	0.0144928
15156	15189	0.478261
15262	15300	0.246377
15334	15336	0.0144928
15383	15385	0.0144928
15398	15467	0.594203
15540	15553	0.0434783
15613	15627	0.0724638
15673	15726	0.942029
15781	15783	0.0144928
15803	15849	0.478261
15899	15917	0.855072
15937	15938	0.0144928
15950	16027	0.942029
16055	16234	0.927536	TAS1-2
16274	16340	0.623188
16407	16409	0.0144928
16418	16420	0.0144928
16429	16469	0.0724638
16560	16568	0.0434783

## Sheet: RoadMap
mtDNA position- start	mtDNA position- end	% of tested samples	mtDNA regulatory elements
180	186	0.0454545
195	335	0.924242	CSB1-2/ORI-H
378	392	0.242424
400	438	0.0151515	LSP
458	467	0.518939
484	598	0.905303	HSP1
628	687	0.981061	HSP2
722	728	0
781	783	0.106061
793	796	0
803	807	0
832	877	0.977273
922	987	0.772727
1009	1010	0.00378788
1019	1035	0.0530303
1133	1189	0.44697
1229	1253	0.333333
1307	1369	0.708333
1408	1458	0.348485
1475	1556	0.92803
1581	1607	0
1624	1654	0.200758
1694	1697	0
1718	1724	0.0416667
1744	1748	0.0189394
1756	1758	0.0227273
1764	1772	0.0378788
1785	1857	0.973485
1886	1919	0.0151515
1945	2028	0.606061
2059	2064	0.0719697
2088	2155	0.223485
2190	2271	0.17803
2295	2376	0.534091
2391	2394	0.030303
2404	2416	0.238636
2445	2496	0.363636
2530	2537	0.00378788
2550	2565	0.0113636
2579	2589	0.030303
2600	2619	0.825758
2660	2674	0.0757576
2690	2769	0.992424
2805	2885	0.799242
2999	3001	0.00757576
3023	3026	0.0719697
3089	3202	0.761364
3254	3315	0.57197	Transcription terminator
3338	3359	0.0151515
3416	3450	0.0568182
3489	3537	0.522727
3578	3583	0.0113636
3589	3591	0.0492424
3603	3621	0.155303
3694	3768	0.507576
3774	3804	0.352273
3817	3830	0.0643939
3880	3935	0.193182
3946	3957	0
3980	4032	0.94697
4088	4119	0.439394
4165	4207	0.977273
4259	4323	0.981061
4341	4342	0.00378788
4356	4380	0
4408	4412	0.0416667
4427	4476	0.246212
4555	4608	0.943182
4633	4686	0.102273
4731	4791	0.973485
4835	4841	0
4848	4851	0.00757576
4885	4928	0.950758
4989	5007	0
5049	5106	0.984848
5180	5285	0.837121
5309	5339	0.329545
5375	5467	0.833333
5480	5577	0.931818
5633	5665	0.390152
5674	5690	0.333333
5707	5790	0.837121	ORI-L
5832	5921	0.833333
5938	5982	0.890152
6001	6037	0.405303
6099	6135	0.867424
6147	6159	0.00378788
6182	6257	0.988636
6263	6278	0.0492424
6285	6289	0.0984848
6311	6329	0
6355	6454	0.996212
6480	6502	0.189394
6554	6557	0.0530303
6568	6624	0.537879
6630	6654	0.030303
6681	6685	0.0833333
6694	6699	0.253788
6717	6737	0.223485
6782	6800	0.768939
6829	6846	0.00757576
6904	6915	0.162879
6953	6966	0.00757576
7029	7067	0.55303
7138	7141	0.00757576
7148	7179	0.25
7193	7211	0.00378788
7270	7457	0.996212
7480	7485	0
7498	7570	0.939394
7610	7665	0.287879
7720	7731	0.0378788
7738	7799	0.132576
7827	7836	0.00378788
7888	7937	0.291667
7952	7956	0.0113636
7990	8005	0.00378788
8013	8015	0.00378788
8031	8076	0.787879
8109	8112	0.094697
8125	8146	0.0492424
8168	8172	0
8201	8347	0.981061
8371	8389	0.0151515
8440	8529	0.829545
8546	8607	0.155303
8657	8667	0
8695	8767	0.977273
8775	8793	0.0113636
8836	8852	0.0151515
8858	8872	0.0227273
8883	8901	0.0113636
8923	8976	0.746212
9003	9004	0
9012	9015	0.00378788
9028	9037	0.0340909
9063	9119	1
9248	9293	0.094697
9360	9392	0
9414	9509	0.988636
9528	9568	0.0568182
9579	9631	0.564394
9663	9734	0.992424
9741	9764	0.0378788
9812	9814	0.00378788
9823	9861	0.299242
9905	9923	0.0227273
9929	9947	0
9964	9968	0.166667
9980	9981	0.227273
10024	10027	0.00757576
10038	10039	0.0454545
10048	10121	0.981061
10166	10252	0.761364
10294	10341	0.958333
10416	10418	0.0265152	Jun-D;c-Jun
10424	10508	0.969697
10540	10541	0
10609	10694	0.128788
10760	10799	0.0643939
10845	10905	0.897727
10911	10942	0.106061
10948	10968	0.731061
11046	11121	0.992424
11182	11217	0.19697
11345	11393	0.984848
11410	11414	0	CEBPb
11432	11465	0.094697
11508	11538	0.181818
11550	11571	0.231061
11581	11603	0.181818
11647	11726	0.439394
11763	11765	0.0113636
11782	11784	0.00757576
11800	11847	0.844697
11917	11966	0.723485
11983	11987	0.0454545
11996	11998	0.00757576
12059	12105	0.92803
12144	12196	0.700758
12236	12296	0.924242
12337	12387	0.965909
12415	12424	0.0340909
12431	12449	0.19697
12455	12465	0.030303
12481	12503	0.0265152
12509	12529	0.0113636
12573	12607	0.931818
12672	12718	0.996212
12781	12795	0.223485
12843	12882	0.416667
12923	12931	0.0340909
12939	12956	0.0757576
13012	13038	0.310606
13066	13115	0.912879
13123	13136	0.0340909
13155	13199	0.840909
13207	13216	0.0530303
13229	13274	0.462121
13319	13321	0
13337	13346	0.0530303
13392	13450	0.996212
13492	13494	0.291667
13545	13583	0.814394
13638	13661	0.117424
13669	13694	0.162879
13701	13734	0.0265152
13740	13750	0.0151515
13756	13758	0.0984848
13780	13793	0.761364
13810	13830	0
13855	13938	0.435606
13944	13966	0.310606
14009	14028	0.367424
14048	14114	0.386364
14181	14213	0.284091
14267	14331	0.768939
14434	14435	0
14479	14548	1
14556	14566	0
14586	14618	0.443182
14643	14683	0.234848	Mef2D
14743	14815	0.977273
14899	14904	0.32197
14987	15001	0.132576
15134	15136	0
15156	15189	0.193182
15262	15300	0.318182
15334	15336	0.0113636
15383	15385	0
15398	15467	0.458333
15540	15553	0.0606061
15613	15627	0.0568182
15673	15726	0.950758
15781	15783	0.0530303
15803	15849	0.791667
15899	15917	0.655303
15937	15938	0.0340909
15950	16027	0.984848
16055	16234	0.973485
16274	16340	0.863636	TAS1-2
16407	16409	0.0378788
16418	16420	0.0151515
16429	16469	0.0416667
16560	16568	0.382576

## Sheet: Common DGF sites
#	mtDNA position- start	mtDNA position- end	mtDNA regulatory elements
1	484	598	HSP1
2	628	687	HSP2
3	1785	1857
4	2690	2769
5	4165	4207
6	4259	4323
7	4885	4928
8	5049	5106
9	5480	5577
10	6182	6257
11	6355	6454
12	7270	7364
13	7365	7457
14	8201	8347
15	9063	9119
16	9663	9734
17	10048	10121
18	10294	10341	Jun-D/c-Jun
19	10424	10508
20	11046	11121
21	11345	11393	CEBPb
22	12672	12718
23	13066	13115
24	13392	13450
25	14479	14548
26	14743	14815
27	15673	15726
28	15950	16027
29	16055	16234	TAS1/2

## Sheet: Fetal vs Nonfetal (ENCODE & RM)
195	335	0.884058	0.928571	0.9			FETAL-ENCODE	FETAL-NONfetal
378	392	0.0144928	0.241071	0.25			0.226579	-0.00892857
400	438	0.101449	0	0.1			-0.101449	-0.1
458	467	0.0289855	0.508929	0.575			0.479943	-0.0660714
484	598	0.913043	0.910714	0.875			-0.00232919	0.0357143
628	687	0.913043	0.986607	0.95			0.0735637	0.0366071
722	728	0.0144928	0	0			-0.0144928	0
781	783	0.0144928	0.09375	0.175			0.0792572	-0.08125
793	796	0.0144928	0	0			-0.0144928	0
803	807	0.0144928	0	0			-0.0144928	0
832	877	0.884058	0.982143	0.95			0.0980849	0.0321429
922	987	0.768116	0.776786	0.75			0.00866977	0.0267857
1009	1010	0.0144928	0.00446429	0			-0.0100285	0.00446429
1019	1035	0.0289855	0.0580357	0.025			0.0290502	0.0330357
1133	1189	0.405797	0.46875	0.325			0.0629529	0.14375
1229	1253	0.231884	0.325893	0.375			0.0940088	-0.0491071
1307	1369	0.652174	0.71875	0.65			0.0665761	0.06875
1408	1458	0.695652	0.357143	0.3			-0.338509	0.0571429
1475	1556	0.869565	0.928571	0.925			0.0590062	0.00357143
1581	1607	0.0144928	0	0			-0.0144928	0
1624	1654	0.73913	0.205357	0.175			-0.533773	0.0303571
1694	1697	0.0289855	0	0			-0.0289855	0
1718	1724	0.0144928	0.0446429	0.025			0.0301501	0.0196429
1744	1748	0.101449	0.0133929	0.05			-0.0880564	-0.0366071
1756	1758	0.0144928	0.0178571	0.05			0.00336439	-0.0321429
1764	1772	0.0434783	0.0178571	0.15			-0.0256211	-0.132143
1785	1857	0.956522	0.977679	0.95			0.0211568	0.0276786
1886	1919	0.057971	0.00446429	0.075			-0.0535067	-0.0705357
1945	2028	0.782609	0.598214	0.65			-0.184394	-0.0517857
2059	2064	0.130435	0.0803571	0.025			-0.0500776	0.0553571
2088	2155	0.463768	0.214286	0.275			-0.249482	-0.0607143
2190	2271	0.173913	0.147321	0.35			-0.0265916	-0.202679
2295	2376	0.391304	0.522321	0.6			0.131017	-0.0776786
2391	2394	0.0144928	0.03125	0.025			0.0167572	0.00625
2404	2416	0.478261	0.200893	0.45			-0.277368	-0.249107
2445	2496	0.898551	0.321429	0.6			-0.577122	-0.278571
2530	2537	0.0289855	0	0.025			-0.0289855	-0.025
2550	2565	0.0434783	0.0133929	0			-0.0300854	0.0133929
2579	2589	0.057971	0.0267857	0.05			-0.0311853	-0.0232143
2600	2619	0.73913	0.821429	0.85			0.0822981	-0.0285714
2660	2674	0.144928	0.0401786	0.275			-0.104749	-0.234821
2690	2769	0.956522	0.991071	1			0.0345497	-0.00892857
2805	2885	0.710145	0.785714	0.875			0.0755694	-0.0892857
2999	3001	0.0144928	0.00446429	0.025			-0.0100285	-0.0205357
3023	3026	0.0144928	0.0714286	0.075			0.0569358	-0.00357143
3089	3202	0.376812	0.758929	0.775			0.382117	-0.0160714
3254	3315	0.73913	0.544643	0.725			-0.194488	-0.180357
3338	3359	0.101449	0.0133929	0.025			-0.0880564	-0.0116071
3416	3450	0.101449	0.0669643	0			-0.034485	0.0669643
3489	3537	0.536232	0.513393	0.575			-0.022839	-0.0616071
3578	3583	0.0144928	0.0133929	0			-0.0010999	0.0133929
3589	3591	0.057971	0.0535714	0.025			-0.00439959	0.0285714
3603	3621	0.115942	0.160714	0.125			0.0447723	0.0357143
3694	3768	0.782609	0.5	0.55			-0.282609	-0.05
3774	3804	0.0144928	0.379464	0.2			0.364972	0.179464
3817	3830	0.289855	0.0625	0.075			-0.227355	-0.0125
3880	3935	0.15942	0.183036	0.25			0.0236154	-0.0669643
3946	3957	0.0144928	0	0			-0.0144928	0
3980	4032	0.898551	0.955357	0.9			0.0568064	0.0553571
4088	4119	0.869565	0.455357	0.35			-0.414208	0.105357
4165	4207	0.985507	0.986607	0.925			0.0010999	0.0616071
4259	4323	0.971014	0.991071	0.925			0.0200569	0.0660714
4341	4342	0.0144928	0	0.025			-0.0144928	-0.025
4356	4380	0.0434783	0	0			-0.0434783	0
4408	4412	0.0144928	0.0491071	0			0.0346144	0.0491071
4427	4476	0.231884	0.254464	0.2			0.0225802	0.0544643
4555	4608	0.681159	0.950893	0.9			0.269733	0.0508929
4633	4686	0.246377	0.107143	0.075			-0.139234	0.0321429
4731	4791	0.855072	0.973214	0.975			0.118142	-0.00178571
4835	4841	0.0144928	0	0			-0.0144928	0
4848	4851	0.0144928	0.00446429	0.025			-0.0100285	-0.0205357
4885	4928	0.913043	0.955357	0.925			0.0423137	0.0303571
4989	5007	0.0434783	0	0			-0.0434783	0
5049	5106	0.985507	0.991071	0.95			0.00556418	0.0410714
5180	5285	0.797101	0.870536	0.65			0.0734343	0.220536
5309	5339	0.0724638	0.308036	0.45			0.235572	-0.141964
5375	5467	0.724638	0.825893	0.875			0.101255	-0.0491071
5480	5577	0.927536	0.950893	0.825			0.0233566	0.125893
5633	5665	0.666667	0.383929	0.425			-0.282738	-0.0410714
5674	5690	0.0434783	0.348214	0.25			0.304736	0.0982143
5707	5790	0.913043	0.816964	0.95			-0.0960792	-0.133036
5832	5921	0.347826	0.857143	0.7			0.509317	0.157143
5938	5982	0.681159	0.892857	0.875			0.211698	0.0178571
6001	6037	0.768116	0.410714	0.375			-0.357402	0.0357143
6099	6135	0.826087	0.861607	0.9			0.0355202	-0.0383929
6147	6159	0.057971	0.00446429	0			-0.0535067	0.00446429
6182	6257	0.956522	0.991071	0.975			0.0345497	0.0160714
6263	6278	0.0434783	0.0357143	0.125			-0.00776398	-0.0892857
6285	6289	0.0144928	0.0848214	0.175			0.0703287	-0.0901786
6311	6329	0.0289855	0	0			-0.0289855	0
6355	6454	0.956522	0.995536	1			0.039014	-0.00446429
6480	6502	0.15942	0.196429	0.15			0.0370083	0.0464286
6554	6557	0.0869565	0.0491071	0.075			-0.0378494	-0.0258929
6568	6624	0.188406	0.526786	0.6			0.33838	-0.0732143
6630	6654	0.0869565	0.03125	0.025			-0.0557065	0.00625
6681	6685	0.0144928	0.0803571	0.1			0.0658644	-0.0196429
6694	6699	0.0289855	0.245536	0.3			0.21655	-0.0544643
6717	6737	0.173913	0.205357	0.325			0.0314441	-0.119643
6782	6800	0.15942	0.772321	0.75			0.612901	0.0223214
6829	6846	0.0289855	0	0.05			-0.0289855	-0.05
6904	6915	0.130435	0.165179	0.15			0.0347438	0.0151786
6953	6966	0.0144928	0.00892857	0			-0.00556418	0.00892857
7029	7067	0.666667	0.580357	0.4			-0.0863095	0.180357
7138	7141	0.0144928	0.00446429	0.025			-0.0100285	-0.0205357
7148	7179	0.507246	0.254464	0.225			-0.252782	0.0294643
7193	7211	0.0144928	0.00446429	0			-0.0100285	0.00446429
7270	7364	0.942029	1	0.98			0.057971	0.02
7365	7457	0.956522	1	0.975			0.0434783	0.025
7480	7485	0.0144928	0	0			-0.0144928	0
7498	7570	0.826087	0.933036	0.975			0.106949	-0.0419643
7610	7665	0.26087	0.272321	0.375			0.0114519	-0.102679
7720	7731	0.0289855	0.03125	0.075			0.00226449	-0.04375
7738	7799	0.289855	0.116071	0.225			-0.173784	-0.108929
7827	7836	0.101449	0	0.025			-0.101449	-0.025
7888	7937	0.550725	0.308036	0.2			-0.242689	0.108036
7952	7956	0.0144928	0.00892857	0.025			-0.00556418	-0.0160714
7990	8005	0.0144928	0.00446429	0			-0.0100285	0.00446429
8013	8015	0.0144928	0.00446429	0			-0.0100285	0.00446429
8031	8076	0.913043	0.776786	0.85			-0.136258	-0.0732143
8109	8112	0.130435	0.0625	0.275			-0.0679348	-0.2125
8125	8146	0.144928	0.03125	0.15			-0.113678	-0.11875
8168	8172	0.0144928	0	0			-0.0144928	0
8201	8347	0.942029	0.977679	1			0.0356496	-0.0223214
8371	8389	0.0289855	0.00446429	0.075			-0.0245212	-0.0705357
8440	8529	0.898551	0.808036	0.95			-0.090515	-0.141964
8546	8607	0.115942	0.169643	0.075			0.0537008	0.0946429
8657	8667	0.0144928	0	0			-0.0144928	0
8695	8767	0.884058	0.986607	0.925			0.102549	0.0616071
8775	8793	0.0434783	0.0133929	0			-0.0300854	0.0133929
8836	8852	0.0144928	0.0133929	0.025			-0.0010999	-0.0116071
8858	8872	0.057971	0.00446429	0.125			-0.0535067	-0.120536
8883	8901	0.362319	0.00446429	0.05			-0.357855	-0.0455357
8923	8976	0.521739	0.785714	0.525			0.263975	0.260714
9003	9004	0.0144928	0	0			-0.0144928	0
9012	9015	0.0144928	0.00446429	0			-0.0100285	0.00446429
9028	9037	0.0289855	0.0357143	0.025			0.00672878	0.0107143
9063	9119	0.985507	1	1			0.0144928	0
9248	9293	0.202899	0.0848214	0.15			-0.118077	-0.0651786
9360	9392	0.0289855	0	0			-0.0289855	0
9414	9509	0.898551	0.995536	0.95			0.096985	0.0455357
9528	9568	0.0724638	0.0580357	0.05			-0.0144281	0.00803571
9579	9631	0.507246	0.580357	0.475			0.0731108	0.105357
9663	9734	1	0.991071	1			-0.00892857	-0.00892857
9741	9764	0.289855	0.0267857	0.1			-0.263069	-0.0732143
9812	9814	0.0144928	0.00446429	0			-0.0100285	0.00446429
9823	9861	0.173913	0.303571	0.275			0.129658	0.0285714
9905	9923	0.0869565	0.0267857	0			-0.0601708	0.0267857
9929	9947	0.0434783	0	0			-0.0434783	0
9964	9968	0.0144928	0.160714	0.2			0.146222	-0.0392857
9980	9981	0.0144928	0.236607	0.175			0.222114	0.0616071
10024	10027	0.0144928	0.00892857	0			-0.00556418	0.00892857
10038	10039	0.0144928	0.03125	0.125			0.0167572	-0.09375
10048	10121	0.956522	0.982143	0.975			0.0256211	0.00714286
10166	10252	0.985507	0.736607	0.9			-0.2489	-0.163393
10294	10341	0.985507	0.955357	0.975			-0.0301501	-0.0196429
10416	10418	0.0144928	0.0223214	0.05			0.00782867	-0.0276786
10424	10508	0.942029	0.96875	0.975			0.026721	-0.00625
10540	10541	0.0144928	0	0			-0.0144928	0
10609	10694	0.115942	0.147321	0.025			0.0313794	0.122321
10760	10799	0.0869565	0.0580357	0.1			-0.0289208	-0.0419643
10845	10905	0.884058	0.915179	0.8			0.0311206	0.115179
10911	10942	0.0724638	0.0758929	0.275			0.00342909	-0.199107
10948	10968	0.869565	0.741071	0.675			-0.128494	0.0660714
11046	11121	0.971014	0.991071	1			0.0200569	-0.00892857
11182	11217	0.405797	0.191964	0.225			-0.213833	-0.0330357
11345	11393	0.927536	0.995536	0.925			0.0679995	0.0705357
11410	11414	0.0144928	0	0			-0.0144928	0
11432	11465	0.637681	0.0625	0.275			-0.575181	-0.2125
11508	11538	0.405797	0.15625	0.325			-0.249547	-0.16875
11550	11571	0.15942	0.241071	0.175			0.0816511	0.0660714
11581	11603	0.26087	0.169643	0.25			-0.0912267	-0.0803571
11647	11726	0.724638	0.428571	0.5			-0.296066	-0.0714286
11763	11765	0.0144928	0.0133929	0			-0.0010999	0.0133929
11782	11784	0.0144928	0.00892857	0			-0.00556418	0.00892857
11800	11847	0.73913	0.870536	0.7			0.131405	0.170536
11917	11966	0.362319	0.754464	0.55			0.392145	0.204464
11983	11987	0.246377	0.0491071	0.025			-0.19727	0.0241071
11996	11998	0.0144928	0.00446429	0.025			-0.0100285	-0.0205357
12059	12105	0.797101	0.9375	0.875			0.140399	0.0625
12144	12196	0.73913	0.714286	0.625			-0.0248447	0.0892857
12236	12296	0.608696	0.959821	0.725			0.351126	0.234821
12337	12387	0.855072	0.982143	0.875			0.12707	0.107143
12415	12424	0.057971	0.0267857	0.075			-0.0311853	-0.0482143
12431	12449	0.188406	0.169643	0.35			-0.0187629	-0.180357
12455	12465	0.0144928	0.0357143	0			0.0212215	0.0357143
12481	12503	0.0289855	0.03125	0			0.00226449	0.03125
12509	12529	0.0289855	0.0133929	0			-0.0155927	0.0133929
12573	12607	0.898551	0.941964	0.875			0.0434136	0.0669643
12672	12718	1	1	0.975			0	0.025
12781	12795	0.521739	0.191964	0.4			-0.329775	-0.208036
12843	12882	0.710145	0.383929	0.6			-0.326216	-0.216071
12923	12931	0.0144928	0.0401786	0			0.0256858	0.0401786
12939	12956	0.478261	0.0580357	0.175			-0.420225	-0.116964
13012	13038	0.507246	0.285714	0.45			-0.221532	-0.164286
13066	13115	0.942029	0.901786	0.975			-0.0402433	-0.0732143
13123	13136	0.202899	0.0357143	0.025			-0.167184	0.0107143
13155	13199	0.797101	0.848214	0.8			0.0511128	0.0482143
13207	13216	0.188406	0.0357143	0.15			-0.152692	-0.114286
13229	13274	0.884058	0.459821	0.475			-0.424237	-0.0151786
13319	13321	0.0144928	0	0			-0.0144928	0
13337	13346	0.202899	0.0625	0			-0.140399	0.0625
13392	13450	0.985507	0.995536	1			0.0100285	-0.00446429
13492	13494	0.0144928	0.290179	0.3			0.275686	-0.00982143
13545	13583	0.608696	0.803571	0.875			0.194876	-0.0714286
13638	13661	0.0289855	0.111607	0.15			0.0826216	-0.0383929
13669	13694	0.0289855	0.151786	0.225			0.1228	-0.0732143
13701	13734	0.144928	0.0223214	0.05			-0.122606	-0.0276786
13740	13750	0.0434783	0.0133929	0.025			-0.0300854	-0.0116071
13756	13758	0.0144928	0.107143	0.05			0.0926501	0.0571429
13780	13793	0.753623	0.732143	0.925			-0.0214803	-0.192857
13810	13830	0.0144928	0	0			-0.0144928	0
13855	13938	0.782609	0.40625	0.6			-0.376359	-0.19375
13944	13966	0.681159	0.321429	0.25			-0.359731	0.0714286
14009	14028	0.623188	0.357143	0.425			-0.266046	-0.0678571
14048	14114	0.811594	0.361607	0.525			-0.449987	-0.163393
14181	14213	0.347826	0.285714	0.275			-0.0621118	0.0107143
14267	14331	0.826087	0.754464	0.85			-0.0716227	-0.0955357
14434	14435	0.0144928	0	0			-0.0144928	0
14479	14548	0.985507	1	1			0.0144928	0
14556	14566	0.0144928	0	0			-0.0144928	0
14586	14618	0.652174	0.428571	0.525			-0.223602	-0.0964286
14643	14683	0.333333	0.223214	0.3			-0.110119	-0.0767857
14743	14815	0.971014	0.977679	0.975			0.00666408	0.00267857
14899	14904	0.0144928	0.34375	0.2			0.329257	0.14375
14987	15001	0.144928	0.129464	0.15			-0.0154633	-0.0205357
15134	15136	0.0144928	0	0			-0.0144928	0
15156	15189	0.478261	0.169643	0.325			-0.308618	-0.155357
15262	15300	0.246377	0.303571	0.4			0.0571946	-0.0964286
15334	15336	0.0144928	0.0133929	0			-0.0010999	0.0133929
15383	15385	0.0144928	0	0			-0.0144928	0
15398	15467	0.594203	0.455357	0.475			-0.138846	-0.0196429
15540	15553	0.0434783	0.0535714	0.1			0.0100932	-0.0464286
15613	15627	0.0724638	0.0535714	0.075			-0.0188923	-0.0214286
15673	15726	0.942029	0.946429	0.975			0.00439959	-0.0285714
15781	15783	0.0144928	0.0491071	0.075			0.0346144	-0.0258929
15803	15849	0.478261	0.8125	0.675			0.334239	0.1375
15899	15917	0.855072	0.665179	0.6			-0.189894	0.0651786
15937	15938	0.0144928	0.0401786	0			0.0256858	0.0401786
15950	16027	0.942029	0.986607	0.975			0.0445782	0.0116071
16055	16234	0.927536	0.977679	0.95			0.0501423	0.0276786
16274	16340	0.623188	0.875	0.8			0.251812	0.075
16407	16409	0.0144928	0.0401786	0.025			0.0256858	0.0151786
16418	16420	0.0144928	0.0133929	0.025			-0.0010999	-0.0116071
16429	16469	0.0724638	0.0491071	0			-0.0233566	0.0491071
16560	16568	0.0434783	0.419643	0.175			0.376165	0.244643
start	end	ENCODE	Fetal	NONfetal			#VALUE!	#VALUE!
						average	#VALUE!	#VALUE!
						SD	#VALUE!	#VALUE!
							#VALUE!	#VALUE!
							#VALUE!	#VALUE!
