# Supplementary material for: A common pattern of DNase I footprinting throughout the human mtDNA unveils clues for a chromatin-like organization
Source: HighWire-hosted journal article supplement (doi:10.1101/gr.230409.117), 2018-07-12
Supplement: Supplemental_TableS3_human_mt-DGF_from_ATAC-seq_REVISED.xlsx [file Supplemental_TableS3_human_mt-DGF_from_ATAC-seq_REVISED.xlsx]

## Sheet: ATAC prevalence common mt-DGF
mtDNA position - start	mtDNA position -end	Prevalence of site (%)
484	598	20
628	687	100		Supplemental Table S3: Human mt-DGF sites from ATAC-seq samples. Highlighted are the mt-DGFs that were found in at least 2/3 tested cell lines
1785	1857	90
2690	2769	10
4165	4207	60
4259	4323	30
4885	4928	0
5049	5106	100
5480	5577	60
6182	6257	100
6355	6454	80
7270	7364	100
7365	7457	50
8201	8347	100
9063	9119	10
9663	9734	100
10048	10121	100
10294	10341	50
10424	10508	100
11046	11121	90
11345	11393	0
12672	12718	90
13066	13115	0
13392	13450	30
14479	14548	100
14743	14815	100
15673	15726	50
15950	16027	80
16055	16234	100

## Sheet: ATAC prevalence all mt-DGF
start	end	prevalence of site (%)
180	186	20
195	335	100
378	392	0
400	438	100
458	467	0
484	598	20
628	687	100
722	728	0
781	783	0
793	796	0
803	807	0
832	877	70
922	987	0
1009	1010	0
1019	1035	0
1133	1189	70
1229	1253	90
1307	1369	70
1408	1458	0
1475	1556	80
1581	1607	80
1624	1654	30
1694	1697	0
1718	1724	0
1744	1748	0
1756	1758	0
1764	1772	80
1785	1857	90
1886	1919	0
1945	2028	70
2059	2064	0
2088	2155	100
2190	2271	60
2295	2376	0
2391	2394	0
2404	2416	0
2445	2496	100
2530	2537	0
2550	2565	0
2579	2589	0
2600	2619	0
2660	2674	0
2690	2769	10
2805	2885	100
2999	3001	0
3023	3026	0
3089	3202	40
3254	3315	80
3338	3359	30
3416	3450	20
3489	3537	0
3578	3583	30
3589	3591	30
3603	3621	0
3694	3768	0
3774	3804	0
3817	3830	0
3880	3935	0
3946	3957	0
3980	4032	80
4088	4119	0
4165	4207	60
4259	4323	30
4341	4342	0
4356	4380	90
4408	4412	70
4427	4476	70
4555	4608	100
4633	4686	60
4731	4791	70
4835	4841	0
4848	4851	0
4885	4928	0
4989	5007	0
5049	5106	100
5180	5285	100
5309	5339	0
5375	5467	60
5480	5577	60
5633	5665	0
5674	5690	0
5707	5790	100
5832	5921	30
5938	5982	100
6001	6037	0
6099	6135	10
6147	6159	70
6182	6257	100
6263	6278	0
6285	6289	0
6311	6329	0
6355	6454	80
6480	6502	0
6554	6557	0
6568	6624	40
6630	6654	100
6681	6685	0
6694	6699	0
6717	6737	0
6782	6800	0
6829	6846	0
6904	6915	0
6953	6966	0
7029	7067	50
7138	7141	0
7148	7179	90
7193	7211	30
7270	7457	100
7480	7485	100
7498	7570	30
7610	7665	0
7720	7731	80
7738	7799	70
7827	7836	0
7888	7937	0
7952	7956	0
7990	8005	70
8013	8015	0
8031	8076	0
8109	8112	20
8125	8146	60
8168	8172	0
8201	8347	100
8371	8389	0
8440	8529	70
8546	8607	60
8657	8667	10
8695	8767	80
8775	8793	60
8836	8852	0
8858	8872	60
8883	8901	50
8923	8976	0
9003	9004	100
9012	9015	100
9028	9037	0
9063	9119	10
9248	9293	0
9360	9392	90
9414	9509	100
9528	9568	0
9579	9631	80
9663	9734	100
9741	9764	0
9812	9814	0
9823	9861	10
9905	9923	60
9929	9947	0
9964	9968	0
9980	9981	0
10024	10027	30
10038	10039	100
10048	10121	100
10166	10252	100
10294	10341	50
10416	10418	0
10424	10508	100
10540	10541	0
10609	10694	0
10760	10799	0
10845	10905	10
10911	10942	50
10948	10968	0
11046	11121	90
11182	11217	0
11345	11393	0
11410	11414	0
11432	11465	0
11508	11538	0
11550	11571	0
11581	11603	0
11647	11726	0
11763	11765	0
11782	11784	0
11800	11847	0
11917	11966	60
11983	11987	0
11996	11998	0
12059	12105	0
12144	12196	70
12236	12296	90
12337	12387	100
12415	12424	70
12431	12449	100
12455	12465	0
12481	12503	0
12509	12529	0
12573	12607	0
12672	12718	90
12781	12795	0
12843	12882	20
12923	12931	0
12939	12956	0
13012	13038	0
13066	13115	0
13123	13136	30
13155	13199	0
13207	13216	0
13229	13274	40
13319	13321	0
13337	13346	0
13392	13450	30
13492	13494	0
13545	13583	0
13638	13661	30
13669	13694	80
13701	13734	20
13740	13750	100
13756	13758	70
13780	13793	0
13810	13830	0
13855	13938	100
13944	13966	0
14009	14028	0
14048	14114	90
14181	14213	80
14267	14331	30
14434	14435	0
14479	14548	100
14556	14566	0
14586	14618	100
14643	14683	70
14743	14815	100
14899	14904	0
14987	15001	30
15134	15136	0
15156	15189	10
15262	15300	0
15334	15336	0
15383	15385	0
15398	15467	0
15540	15553	0
15613	15627	0
15673	15726	50
15781	15783	0
15803	15849	70
15899	15917	0
15937	15938	0
15950	16027	80
16055	16234	100
16274	16340	20
16407	16409	0
16418	16420	0
16429	16469	0
16560	16568	0

## Sheet: ATAC-seq raw data
	# of mt-DGF sites	mt-DGF Length average (nucleotides)	Length(SD)
Neural stem cell (ERR1013032)	180	13.3333	13.9972
Neural stem cell (ERR1013034)	169	14.1953	14.7092
Neural stem cell (ERR1013035)	167	13.5808	14.5483
GM12878_1	181	13.6243	14.1462
GM12878_2	187	12.9893	13.7696
GM12878_3	169	14.6805	14.8349
GM12878_4	175	14.1314	14.3627
CD34 (SRR2453157)	170	15.1	14.9696
CD34 (SRR2453158)	174	14.6839	14.919
CD34 (SRR2453163)	172	15.0523	14.626
