# Supplementary material for: A common pattern of DNase I footprinting throughout the human mtDNA unveils clues for a chromatin-like organization
Source: HighWire-hosted journal article supplement (doi:10.1101/gr.230409.117), 2018-07-12
Supplement: Supplemental_TableS4_mouse_DGFs_sites.xlsx [file Supplemental_TableS4_mouse_DGFs_sites.xlsx]

## Sheet: גיליון1
Mouse mt-DGF sites
	mtDNA position - start	mtDNA position - end	% of tested samples		Supplemental Table S4: Mouse mt-DGF sites extracted from the ENCODE data.
1	24	69	0.232558
2	140	145	0.116279
3	151	215	0.767442
4	253	298	0.860465
5	375	432	0.976744
6	522	584	0.860465
7	600	612	0.0465116
8	717	776	0.837209
9	785	786	0.0232558
10	795	799	0.0232558
11	816	878	0.790698
12	927	931	0.0232558
13	938	1021	0.55814
14	1101	1172	0.906977
15	1189	1203	0.0232558
16	1247	1287	1
17	1321	1333	0.0465116
18	1407	1445	0.325581
19	1467	1562	0.860465
20	1583	1585	0.0232558
21	1638	1701	0.860465
22	1804	1856	0.790698
23	1915	1954	0.488372
24	2028	2057	0.325581
25	2098	2110	0.0465116
26	2147	2211	1
27	2252	2270	0.0465116
28	2278	2284	0.0232558
29	2300	2333	0.697674
30	2393	2398	0.0930233
31	2458	2480	0.534884
32	2529	2545	0.0930233
33	2592	2668	1
34	2729	2770	0.860465
35	2827	2842	0.116279
36	2917	2968	1
37	3024	3072	1
38	3158	3244	0.953488
39	3333	3346	0.0465116
40	3358	3378	0.232558
41	3451	3532	0.813953
42	3617	3656	0.511628
43	3714	3793	0.953488
44	3907	3962	0.744186
45	4000	4006	0.0232558
46	4024	4032	0.0465116
47	4069	4079	0.0232558
48	4155	4206	0.953488
49	4270	4272	0.0465116
50	4280	4311	0.860465
51	4347	4396	0.813953
52	4414	4418	0.209302
53	4464	4466	0.0465116
54	4500	4505	0.0465116
55	4558	4621	0.651163
56	4696	4698	0.0232558
57	4746	4801	0.790698
58	4853	4879	0.162791
59	5008	5063	0.906977
60	5084	5096	0.139535
61	5129	5210	0.976744
62	5264	5307	0.860465
63	5369	5380	0.0930233
64	5489	5494	0.0232558
65	5507	5563	0.767442
66	5617	5667	0.953488
67	5692	5708	0.255814
68	5758	5822	0.325581
69	5863	5896	0.186047
70	5957	5958	0.0232558
71	6061	6104	0.860465
72	6147	6178	0.790698
73	6186	6195	0.27907
74	6218	6235	0.465116
75	6321	6379	1
76	6456	6499	0.651163
77	6590	6602	0.186047
78	6668	6717	0.813953
79	6775	6815	0.72093
80	6855	6858	0.0232558
81	6889	6906	0.0465116
82	6950	7022	1
83	7077	7105	0.186047
84	7187	7222	0.302326
85	7340	7375	0.674419
86	7435	7439	0.0232558
87	7458	7516	1
88	7565	7593	0.488372
89	7660	7672	0.0232558
90	7724	7737	0.162791
91	7752	7772	0.0232558
92	7778	7827	1
93	7902	7948	0.953488
94	8027	8033	0.0232558
95	8123	8142	0.0697674
96	8152	8195	0.348837
97	8203	8207	0.0232558
98	8324	8373	0.953488
99	8464	8513	0.930233
100	8567	8598	0.511628
101	8706	8749	0.72093
102	8840	8888	0.767442
103	8995	9030	0.395349
104	9089	9112	0.325581
105	9195	9220	0.0697674
106	9238	9253	0.0930233
107	9261	9268	0.0232558
108	9299	9312	0.0697674
109	9357	9412	0.813953
110	9449	9507	0.976744
111	9542	9546	0.162791
112	9609	9648	0.511628
113	9705	9740	0.674419
114	9797	9861	0.906977
115	9955	10014	0.744186
116	10039	10052	0.0232558
117	10135	10136	0.0232558
118	10143	10148	0.0232558
119	10155	10184	0.139535
120	10425	10537	0.604651
121	10543	10563	0.0465116
122	10620	10625	0.0232558
123	10749	10797	0.651163
124	10935	10989	0.860465
125	11041	11047	0.0465116
126	11074	11076	0.0232558
127	11291	11380	1
128	11463	11500	0.395349
129	11626	11677	0.418605
130	11689	11697	0.139535
131	11739	11801	1
132	11848	11911	0.44186
133	11960	11995	0.232558
134	12070	12104	0.488372
135	12158	12172	0.0232558
136	12179	12182	0.0232558
137	12324	12376	0.976744
138	12463	12512	0.604651
139	12537	12540	0.0232558
140	12564	12590	0.325581
141	12723	12759	0.581395
142	12817	12840	0.488372
143	12898	12930	0.372093
144	12972	13025	1
145	13130	13131	0.0232558
146	13192	13224	0.0930233
147	13255	13313	1
148	13380	13403	0.325581
149	13471	13544	1
150	13573	13580	0.0232558
151	13590	13602	0.0465116
152	13629	13635	0.0930233
153	13741	13803	0.953488
154	13884	13942	0.837209
155	14008	14065	0.744186
156	14087	14094	0.0465116
157	14145	14200	0.976744
158	14287	14321	0.534884
159	14391	14417	0.581395
160	14428	14456	0.0930233
161	14464	14494	0.465116
162	14674	14696	0.0232558
163	14804	14869	0.906977
164	14928	14961	0.162791
165	15013	15064	1
166	15117	15136	0.372093
167	15193	15215	0.0930233
168	15261	15325	0.930233
169	15362	15374	0.255814
170	15423	15451	0.116279
171	15480	15556	0.744186
172	15629	15661	0.116279
173	15745	15797	0.860465
174	15883	15889	0.0232558
175	15909	15911	0.0232558
176	16022	16110	0.976744
177	16134	16189	0.395349
178	16198	16245	0.255814
