# Supplementary material for: A common pattern of DNase I footprinting throughout the human mtDNA unveils clues for a chromatin-like organization
Source: HighWire-hosted journal article supplement (doi:10.1101/gr.230409.117), 2018-07-12
Supplement: Supplemental_TableS5_pausing_sites.xlsx [file Supplemental_TableS5_pausing_sites.xlsx]

## Sheet: גיליון1
	Heavy strand pausing sites
		start	end	%of tested cells
1	mtDNA	42	108	0.727273		Supplemental Table S5: Common Pausing sites throughout the Human mtDNA.
2	mtDNA	926	968	0.727273
3	mtDNA	1169	1221	0.818182
4	mtDNA	1422	1467	0.727273
5	mtDNA	2596	2654	0.727273
6	mtDNA	3783	3838	0.818182
7	mtDNA	5561	5618	0.727273
8	mtDNA	5787	5835	0.909091
9	mtDNA	6703	6744	0.727273
10	mtDNA	6768	6806	0.727273
11	mtDNA	8473	8538	0.727273
12	mtDNA	9467	9513	0.727273
13	mtDNA	10102	10159	0.727273
14	mtDNA	10750	10812	0.818182
15	mtDNA	13376	13425	0.727273
16	mtDNA	14699	14747	0.818182
17	mtDNA	15058	15105	0.727273
	Light strand pausing sites
		start	end	%of tested cells
1	mtDNA	355	399	1
2	mtDNA	3745	3797	0.818182
3	mtDNA	12673	12717	0.727273
