# Supplementary material for: A common pattern of DNase I footprinting throughout the human mtDNA unveils clues for a chromatin-like organization
Source: HighWire-hosted journal article supplement (doi:10.1101/gr.230409.117), 2018-07-12
Supplement: Supplemental_TableS6_human_GQP_sites.xlsx [file Supplemental_TableS6_human_GQP_sites.xlsx]

## Sheet: Human mtDNA GQP sites
mtDNA position	140	168			Supplemental Table S6: G-quadruplex (GQP) sites in human mtDNA.
mtDNA position	305	316
mtDNA position	324	357
mtDNA position	370	388
mtDNA position	433	464
mtDNA position	495	512
mtDNA position	542	574
mtDNA position	637	667
mtDNA position	705	738
mtDNA position	792	807
mtDNA position	890	917
mtDNA position	956	966
mtDNA position	1083	1107
mtDNA position	1169	1201
mtDNA position	1223	1255
mtDNA position	1333	1363
mtDNA position	1483	1499
mtDNA position	1662	1686
mtDNA position	1690	1716
mtDNA position	1901	1924
mtDNA position	1996	2026
mtDNA position	2058	2080
mtDNA position	2164	2191
mtDNA position	2254	2284
mtDNA position	2448	2479
mtDNA position	2488	2503
mtDNA position	2513	2545
mtDNA position	2761	2790
mtDNA position	2810	2844
mtDNA position	3148	3173
mtDNA position	3311	3332
mtDNA position	3476	3508
mtDNA position	3524	3535
mtDNA position	3568	3589
mtDNA position	3597	3614
mtDNA position	3626	3643
mtDNA position	3782	3800
mtDNA position	3831	3853
mtDNA position	3884	3898
mtDNA position	3953	3970
mtDNA position	4088	4112
mtDNA position	4137	4169
mtDNA position	4170	4198
mtDNA position	4229	4261
mtDNA position	4354	4384
mtDNA position	4431	4458
mtDNA position	4461	4491
mtDNA position	4593	4626
mtDNA position	4649	4678
mtDNA position	4711	4740
mtDNA position	4815	4848
mtDNA position	4879	4910
mtDNA position	5137	5169
mtDNA position	5194	5220
mtDNA position	5232	5265
mtDNA position	5308	5338
mtDNA position	5348	5370
mtDNA position	5433	5464
mtDNA position	5477	5492
mtDNA position	5735	5770
mtDNA position	5839	5868
mtDNA position	5882	5913
mtDNA position	6019	6043
mtDNA position	6155	6188
mtDNA position	6219	6238
mtDNA position	6257	6278
mtDNA position	6290	6320
mtDNA position	6325	6342
mtDNA position	6421	6442
mtDNA position	6447	6469
mtDNA position	6482	6508
mtDNA position	6539	6558
mtDNA position	6571	6604
mtDNA position	6823	6852
mtDNA position	7115	7134
mtDNA position	7199	7216
mtDNA position	7232	7261
mtDNA position	7349	7378
mtDNA position	7397	7428
mtDNA position	7487	7504
mtDNA position	7693	7716
mtDNA position	7786	7803
mtDNA position	7807	7836
mtDNA position	7888	7919
mtDNA position	7958	7983
mtDNA position	8125	8152
mtDNA position	8208	8232
mtDNA position	8252	8285
mtDNA position	8371	8399
mtDNA position	8406	8439
mtDNA position	8467	8482
mtDNA position	8568	8584
mtDNA position	8619	8629
mtDNA position	8775	8793
mtDNA position	8829	8847
mtDNA position	8903	8936
mtDNA position	8940	8972
mtDNA position	8983	9005
mtDNA position	9027	9058
mtDNA position	9060	9088
mtDNA position	9129	9160
mtDNA position	9212	9245
mtDNA position	9248	9280
mtDNA position	9289	9303
mtDNA position	9322	9354
mtDNA position	9407	9433
mtDNA position	9505	9523
mtDNA position	9527	9566
mtDNA position	9573	9601
mtDNA position	9728	9761
mtDNA position	9892	9924
mtDNA position	10069	10101
mtDNA position	10184	10208
mtDNA position	10271	10293
mtDNA position	10544	10567
mtDNA position	10613	10638
mtDNA position	10647	10674
mtDNA position	10727	10759
mtDNA position	10842	10872
mtDNA position	10919	10951
mtDNA position	10968	10983
mtDNA position	10999	11023
mtDNA position	11130	11147
mtDNA position	11161	11187
mtDNA position	11206	11238
mtDNA position	11407	11432
mtDNA position	11532	11544
mtDNA position	11658	11690
mtDNA position	11857	11873
mtDNA position	12086	12112
mtDNA position	12362	12388
mtDNA position	12389	12404
mtDNA position	12432	12463
mtDNA position	12483	12512
mtDNA position	12542	12568
mtDNA position	12885	12916
mtDNA position	12958	12972
mtDNA position	12981	13012
mtDNA position	13026	13079
mtDNA position	13119	13133
mtDNA position	13296	13316
mtDNA position	13364	13385
mtDNA position	13448	13469
mtDNA position	13486	13517
mtDNA position	13639	13654
mtDNA position	13683	13714
mtDNA position	13757	13772
mtDNA position	13782	13807
mtDNA position	13839	13861
mtDNA position	13938	13961
mtDNA position	13971	13991
mtDNA position	13992	14025
mtDNA position	14051	14074
mtDNA position	14116	14138
mtDNA position	14244	14264
mtDNA position	14266	14290
mtDNA position	14334	14344
mtDNA position	14367	14381
mtDNA position	14412	14435
mtDNA position	14471	14494
mtDNA position	14520	14536
mtDNA position	14557	14590
mtDNA position	14620	14644
mtDNA position	14744	14775
mtDNA position	14806	14816
mtDNA position	14862	14877
mtDNA position	14915	14933
mtDNA position	14983	15008
mtDNA position	15126	15156
mtDNA position	15198	15225
mtDNA position	15319	15339
mtDNA position	15381	15412
mtDNA position	15485	15518
mtDNA position	15527	15557
mtDNA position	15568	15600
mtDNA position	15619	15648
mtDNA position	15658	15669
mtDNA position	15727	15744
mtDNA position	15832	15857
mtDNA position	16052	16084
mtDNA position	16107	16135
mtDNA position	16147	16175
mtDNA position	16184	16194
mtDNA position	16250	16269
mtDNA position	16278	16297
mtDNA position	16353	16381
mtDNA position	16400	16412
mtDNA position	16527	16550
