# Supplementary material for: A common pattern of DNase I footprinting throughout the human mtDNA unveils clues for a chromatin-like organization
Source: HighWire-hosted journal article supplement (doi:10.1101/gr.230409.117), 2018-07-12
Supplement: Supplemental_TableS7_TFAM_ChIPseq_and_HELA_DGF_sites.xlsx [file Supplemental_TableS7_TFAM_ChIPseq_and_HELA_DGF_sites.xlsx]

## Sheet: High TFAM occupancy
mtDNA position - Start	mtDNA position - End
39	44		Supplemental Table S7: TFAM occupancy compared to DGF pattern in HeLa cells. High and low TFAM occupancy, as a result of TFAM ChIP-seq analysis performed in human HeLa cells. The specific mt-DGF pattern in HeLa cells is indicated.
50	55
114	125
235	289
338	356
412	422
632	636
755	763
771	785
1644	1653
1938	1948
2191	2217
2314	2327
2457	2488
2761	2767
2936	2946
3036	3060
3156	3159
3278	3293
3358	3375
3607	3630
4086	4115
4223	4233
4444	4455
4647	4674
4966	5006
5101	5133
5178	5216
5267	5285
5362	5384
5404	5434
5517	5544
5858	5889
5977	6001
6073	6084
6201	6207
6280	6293
6718	6727
6801	6818
6975	6989
7062	7087
7274	7290
7341	7349
7569	7603
7659	7668
7688	7708
7765	7784
7927	7953
8340	8352
8514	8526
8639	8665
8722	8734
8978	8990
9027	9045
9398	9408
9566	9579
9589	9607
9685	9699
10151	10188
10257	10268
10278	10292
10319	10356
10497	10515
10664	10673
10744	10755
10894	10916
11012	11026
11187	11223
11447	11458
11890	11893
11967	11976
12011	12024
12051	12064
12227	12245
12336	12346
12516	12527
13006	13030
13098	13119
13478	13503
13620	13649
13798	13809
13828	13841
13974	14002
14193	14227
14373	14385
14461	14470
14597	14631
14725	14770
14825	14854
15069	15091
15319	15337
15361	15371
15476	15504
15573	15591
15823	15834
15886	15898
15960	16001
16070	16083
16104	16148
16202	16243
16329	16354
16482	16505
16520	16540

## Sheet: Low TFAM occupancy
mtDNA position - Start	mtDNA position - End
17	37
142	238
291	351
448	479
501	532
726	744
892	917
968	980
1384	1421
1772	1828
1971	2018
2227	2257
2267	2301
2333	2409
2794	2816
3086	3123
3313	3341
3495	3530
3566	3593
3792	3837
3892	3915
4251	4287
4468	4495
4889	4915
5004	5048
5138	5163
5216	5252
5265	5351
5436	5518
5731	5767
5799	5855
5895	5920
6102	6126
6231	6261
6556	6580
6839	6858
7298	7321
7471	7537
7617	7636
7724	7744
7810	7895
7953	7987
8029	8057
8140	8162
8239	8301
8421	8504
8615	8631
8815	8848
8885	8955
9073	9152
9519	9553
9639	9705
9989	10050
10106	10143
10178	10225
10276	10331
10397	10473
10867	10885
10930	10960
11041	11106
11242	11252
11407	11431
11924	11945
12070	12115
12185	12212
12348	12405
12690	12710
13040	13073
13126	13144
13412	13461
13668	13717
13752	13784
14027	14085
14282	14324
14337	14358
14430	14453
14488	14565
14759	14820
14946	14956
15279	15301
15392	15470
15519	15556
15921	15972
16015	16064
16078	16113
16143	16199
16346	16397
16450	16475

## Sheet: HeLa DGF site
mtDNA position - Start	mtDNA position - End
248	249
251	251
271	319
516	522
583	585
873	873
1449	1456
1510	1514
1519	1520
1794	1795
1805	1815
1825	1830
1979	1987
2234	2251
2255	2271
2405	2411
2473	2486
2660	2665
2715	2745
3139	3145
3149	3160
3162	3167
3354	3358
3498	3536
4008	4009
4094	4096
4105	4106
4169	4190
4294	4294
4885	4912
5055	5082
5637	5655
5733	5767
6201	6205
6208	6216
6400	6404
6411	6421
6723	6727
7040	7054
7391	7398
7645	7652
7657	7665
8058	8062
8130	8141
8253	8265
8288	8291
8602	8605
8724	8730
8937	8938
8947	8950
9073	9108
9452	9453
9676	9680
9686	9701
10064	10093
10181	10181
10194	10242
10481	10487
10490	10494
10787	10794
10939	10942
10948	10953
11066	11101
11358	11373
11442	11447
11515	11527
11530	11538
11587	11587
11589	11599
11669	11696
11707	11715
12178	12178
12180	12191
12682	12690
12693	12711
13098	13107
13158	13161
13208	13214
13418	13436
13438	13445
13551	13553
13950	13959
14061	14081
14268	14292
14491	14529
14763	14796
15157	15185
15263	15289
15689	15703
15963	15967
16080	16116
16547	16553
