# Supplementary material for: A common pattern of DNase I footprinting throughout the human mtDNA unveils clues for a chromatin-like organization
Source: HighWire-hosted journal article supplement (doi:10.1101/gr.230409.117), 2018-07-12
Supplement: Supplemental_TableS8_roadmap_clustering_data.xlsx [file Supplemental_TableS8_roadmap_clustering_data.xlsx]

## Sheet: Statistical data
			Unique
Groups	t	p.value	perms
kidney, muscle	1.6602	0.0001	9849		Supplemental Table S8: RoadMap clustering statistical data – PERMANOVA analysis. Bold are the values that withstood Bonferroni correction for multiple testing.
kidney, skin	1.8627	0.0001	9857
large-intestine, muscle	1.6683	0.0001	9845
lung, muscle	1.7622	0.0001	9851
lung, skin	1.924	0.0001	9887
muscle, skin	2.0606	0.0001	9875
skin, small-intestine	1.9051	0.0001	9782
skin, stomach	2.1608	0.0001	9740
skin, thymus	1.9424	0.0001	8150
large-intestine, skin	1.8893	0.0002	9782
brain, skin	1.8011	0.0003	9354
lung, stomach	1.4899	0.0007	9840
large-intestine, stomach	1.5313	0.0008	9858
kidney, lung	1.4849	0.0009	9837
heart, skin	1.6692	0.0034	9778
heart, muscle	1.4828	0.0035	9857
muscle, small-intestine	1.393	0.0036	9864
heart, kidney	1.4346	0.0046	9861
kidney, stomach	1.3375	0.0048	9842
kidney, large-intestine	1.3103	0.0089	9845
small-intestine, stomach	1.3557	0.0106	9865
heart, stomach	1.4526	0.0142	9872
large-intestine, thymus	1.3249	0.0179	9651
kidney, small-intestine	1.2206	0.032	9838
brain, muscle	1.1994	0.0402	9837
brain, large-intestine	1.1908	0.0416	9806
lung, thymus	1.2076	0.0452	9870
brain, stomach	1.1929	0.0457	9777
heart, lung	1.1877	0.0746	9866
brain, kidney	1.1484	0.0796	9860
heart, large-intestine	1.1759	0.0978	9864
heart, thymus	1.2075	0.1051	9666
brain, heart	1.1716	0.1144	9843
heart, small-intestine	1.1611	0.1233	9882
brain, small-intestine	1.118	0.1257	9817
small-intestine, thymus	1.1229	0.1459	9625
kidney, thymus	1.0764	0.1963	9850
skin, testes	1.1439	0.202	10
brain, thymus	1.0097	0.3723	8779
muscle, stomach	1.0036	0.4117	9858
brain, lung	0.9932	0.462	9853
muscle, thymus	0.97369	0.5159	9866
lung, small-intestine	0.97605	0.523	9868
stomach, thymus	0.95735	0.5825	9501
large-intestine, lung	0.95494	0.6077	9860
kidney, testes	0.80927	0.836	55
large-intestine, testes	0.89111	0.8656	14
testes, thymus	0.86075	0.8865	9
heart, testes	0.81369	0.9297	14
small-intestine, testes	0.83094	0.9297	14
muscle, testes	0.81575	0.9364	47
large-intestine, small-intestine	0.81257	0.9699	9862
brain, testes	0.8603	1	11
lung, testes	0.79454	1	34
stomach, testes	0.84876	1	13

## Sheet: Test details
PERMANOVA
Permutational MANOVA
Data type: Distance
Selection: All
Transform: Square root
Resemblance: D1 Euclidean distance
Sums of squares type: Type III (partial)
Fixed effects sum to zero for mixed terms
Permutation method: Unrestricted permutation of raw data
Number of permutations: 9999
Factors
Name	Abbrev.	Type	Levels
type	ty	Fixed	11
PAIR-WISE TESTS
Term 'ty'
